# Supplementary material for: Using Re-scaled Resilience Screening Index Results and Location Quotients for Socio-Ecological Characterizations in U.S. Coastal Regions
Source: Front Environ Sci. Author manuscript; Available in PMC 2022 Dec 30. (PMC9801489; doi:10.3389/fenvs.2019.00096)
Supplement: SI [file NIHMS1574196-supplement-SI.xlsx]

## Sheet: Unscaled ENOW Results 
Region	FIPS	State Name	County Name	CRSI	Governance	Risk	Built Environment	Society	Natural Environment	CRSI Rank within Region
Great Lakes	17031	Illinois	Cook	1.99233	0.6731	0.56568	0.82804	0.4978	0.19886	72
Great Lakes	17097	Illinois	Lake	2.90782	0.6871	0.42964	0.61256	0.53952	0.45768	42
Great Lakes	18089	Indiana	Lake	1.5391	0.6777	0.51664	0.60187	0.46714	0.26481	83
Great Lakes	18091	Indiana	LaPorte	2.6973	0.77229	0.3142	0.46202	0.50422	0.35593	52
Great Lakes	18127	Indiana	Porter	2.71755	0.68457	0.37403	0.54395	0.56434	0.37662	49
Great Lakes	26001	Michigan	Alcona	2.49634	0.70153	0.27524	0.34673	0.47413	0.45699	55
Great Lakes	26003	Michigan	Alger	2.24518	0.58299	0.29814	0.30091	0.60242	0.47282	63
Great Lakes	26005	Michigan	Allegan	3.64275	0.64977	0.24331	0.51033	0.55482	0.37159	25
Great Lakes	26007	Michigan	Alpena	2.9499	0.72861	0.28358	0.35392	0.51579	0.48453	40
Great Lakes	26009	Michigan	Antrim	2.6448	0.72757	0.27044	0.38736	0.49906	0.39451	54
Great Lakes	26011	Michigan	Arenac	2.92576	0.73157	0.2267	0.36868	0.49218	0.38917	41
Great Lakes	26013	Michigan	Baraga	2.35649	0.61865	0.33633	0.37975	0.55459	0.47961	60
Great Lakes	26017	Michigan	Bay	3.08279	0.69024	0.2079	0.40781	0.50594	0.34466	38
Great Lakes	26019	Michigan	Benzie	3.67941	0.69929	0.18733	0.36465	0.56633	0.36646	23
Great Lakes	26021	Michigan	Berrien	2.20489	0.70765	0.32016	0.51256	0.37549	0.36335	66
Great Lakes	26029	Michigan	Charlevoix	2.71366	0.74482	0.27619	0.3835	0.59352	0.33268	51
Great Lakes	26031	Michigan	Cheboygan	3.35135	0.68648	0.2844	0.44661	0.56085	0.44575	30
Great Lakes	26033	Michigan	Chippewa	3.8879	0.76162	0.23225	0.49045	0.47951	0.38071	19
Great Lakes	26041	Michigan	Delta	3.67245	0.73519	0.29102	0.44537	0.60318	0.43985	24
Great Lakes	26047	Michigan	Emmet	4.03124	0.70648	0.29	0.41031	0.64924	0.52283	16
Great Lakes	26053	Michigan	Gogebic	2.45537	0.66586	0.27966	0.26955	0.53167	0.51578	56
Great Lakes	26055	Michigan	Grand Traverse	3.39933	0.69165	0.25125	0.40672	0.60299	0.3929	29
Great Lakes	26061	Michigan	Houghton	2.40257	0.65954	0.26886	0.33496	0.53293	0.42277	59
Great Lakes	26063	Michigan	Huron	4.88751	0.79206	0.21983	0.51297	0.59369	0.33461	8
Great Lakes	26069	Michigan	Iosco	2.84281	0.69961	0.24896	0.34874	0.49705	0.44959	46
Great Lakes	26083	Michigan	Keweenaw	1.26054	0.82425	0.31828	0.3108	0.27938	0.45116	84
Great Lakes	26089	Michigan	Leelanau	2.89415	0.76951	0.30765	0.38419	0.62183	0.37065	43
Great Lakes	26095	Michigan	Luce	1.93434	0.7485	0.28541	0.27983	0.38858	0.49951	75
Great Lakes	26097	Michigan	Mackinac	2.86653	0.77341	0.29809	0.42308	0.51312	0.39407	44
Great Lakes	26099	Michigan	Macomb	1.96635	0.67403	0.35166	0.51957	0.50136	0.26675	74
Great Lakes	26101	Michigan	Manistee	2.43093	0.69324	0.2646	0.32823	0.52166	0.41811	57
Great Lakes	26103	Michigan	Marquette	3.7184	0.6127	0.31151	0.60877	0.59344	0.44809	22
Great Lakes	26105	Michigan	Mason	3.28922	0.78192	0.2349	0.34694	0.51998	0.42368	33
Great Lakes	26109	Michigan	Menominee	2.40961	0.80467	0.25374	0.37585	0.42493	0.37543	58
Great Lakes	26115	Michigan	Monroe	1.82251	0.66527	0.27393	0.45485	0.48815	0.23544	76
Great Lakes	26121	Michigan	Muskegon	1.73164	0.63088	0.26711	0.35571	0.42985	0.38248	78
Great Lakes	26127	Michigan	Oceana	5.19064	0.67685	0.12371	0.38957	0.51141	0.36827	3
Great Lakes	26131	Michigan	Ontonagon	2.16235	0.65757	0.31386	0.26978	0.58175	0.47587	67
Great Lakes	26139	Michigan	Ottawa	4.46575	0.7318	0.24311	0.5838	0.58758	0.31436	12
Great Lakes	26141	Michigan	Presque Isle	2.21207	0.71825	0.27921	0.35479	0.43639	0.4298	65
Great Lakes	26145	Michigan	Saginaw	3.02265	0.62665	0.24798	0.50971	0.43929	0.39624	39
Great Lakes	26147	Michigan	St. Clair	3.98261	0.6916	0.23862	0.54051	0.48003	0.40268	17
Great Lakes	26151	Michigan	Sanilac	5.02971	0.7726	0.20033	0.46684	0.45106	0.47724	5
Great Lakes	26153	Michigan	Schoolcraft	2.71713	0.68652	0.30884	0.34951	0.49629	0.53506	50
Great Lakes	26157	Michigan	Tuscola	4.12958	0.67956	0.21843	0.48988	0.50939	0.41512	14
Great Lakes	26159	Michigan	Van Buren	1.6358	0.61651	0.28787	0.42504	0.4531	0.30119	81
Great Lakes	26163	Michigan	Wayne	1.57383	0.66257	0.36321	0.65136	0.37345	0.15969	82
Great Lakes	27031	Minnesota	Cook	7.0278	0.74023	0.18009	0.31813	0.91329	0.43422	1
Great Lakes	27075	Minnesota	Lake	4.63081	0.64519	0.26935	0.35877	0.69855	0.65256	10
Great Lakes	27137	Minnesota	St. Louis	5.07325	0.67139	0.34431	0.86125	0.6068	0.45292	4
Great Lakes	36011	New York	Cayuga	3.35099	0.63671	0.24012	0.46417	0.57083	0.36804	31
Great Lakes	36013	New York	Chautauqua	3.46361	0.65548	0.24753	0.56715	0.41426	0.39943	28
Great Lakes	36029	New York	Erie	3.12416	0.65563	0.35833	0.71274	0.54993	0.2957	37
Great Lakes	36045	New York	Jefferson	5.61303	0.70956	0.23301	0.67224	0.48544	0.44632	2
Great Lakes	36055	New York	Monroe	3.25523	0.65223	0.31623	0.62344	0.51931	0.36444	34
Great Lakes	36063	New York	Niagara	2.28173	0.67964	0.34047	0.43245	0.48111	0.42502	62
Great Lakes	36073	New York	Orleans	2.05498	0.72222	0.27956	0.32457	0.44314	0.43096	71
Great Lakes	36075	New York	Oswego	2.84393	0.68429	0.26038	0.56527	0.38919	0.32967	45
Great Lakes	36089	New York	St. Lawrence	4.89277	0.63455	0.25688	0.69065	0.45285	0.50828	7
Great Lakes	36117	New York	Wayne	2.77646	0.70089	0.22441	0.40332	0.46586	0.36546	48
Great Lakes	39007	Ohio	Ashtabula	1.77006	0.61297	0.30316	0.42656	0.46554	0.33501	77
Great Lakes	39035	Ohio	Cuyahoga	2.12888	0.62692	0.40137	0.70965	0.49031	0.20656	69
Great Lakes	39043	Ohio	Erie	2.13421	0.66364	0.27537	0.41308	0.5069	0.32072	68
Great Lakes	39085	Ohio	Lake	1.6819	0.64247	0.32587	0.36141	0.58698	0.29956	80
Great Lakes	39093	Ohio	Lorain	2.07095	0.64915	0.32328	0.49837	0.49182	0.29956	70
Great Lakes	39095	Ohio	Lucas	1.18075	0.6397	0.37334	0.48335	0.47575	0.18951	85
Great Lakes	39123	Ohio	Ottawa	1.72786	0.64467	0.31658	0.37501	0.5789	0.28942	79
Great Lakes	39143	Ohio	Sandusky	2.28695	0.56235	0.27287	0.43811	0.57313	0.33182	61
Great Lakes	39173	Ohio	Wood	3.32219	0.68654	0.315	0.59389	0.52919	0.36661	32
Great Lakes	42049	Pennsylvania	Erie	2.80879	0.61436	0.31549	0.59629	0.50378	0.35101	47
Great Lakes	55003	Wisconsin	Ashland	4.54135	0.80151	0.2837	0.36391	0.73729	0.48356	11
Great Lakes	55007	Wisconsin	Bayfield	3.48574	0.76191	0.28537	0.30943	0.64035	0.49728	27
Great Lakes	55009	Wisconsin	Brown	3.21118	0.73546	0.37889	0.59931	0.60778	0.35084	35
Great Lakes	55029	Wisconsin	Door	4.16669	0.68082	0.29256	0.50682	0.73239	0.40698	13
Great Lakes	55031	Wisconsin	Douglas	3.95108	0.78477	0.26687	0.40878	0.56974	0.46145	18
Great Lakes	55051	Wisconsin	Iron	3.7189	0.78427	0.28134	0.32116	0.66062	0.47997	21
Great Lakes	55059	Wisconsin	Kenosha	1.97259	0.62652	0.33741	0.42128	0.47717	0.40745	73
Great Lakes	55061	Wisconsin	Kewaunee	3.62232	0.70039	0.29166	0.37269	0.69769	0.4654	26
Great Lakes	55071	Wisconsin	Manitowoc	4.05002	0.74552	0.2847	0.4869	0.6278	0.41293	15
Great Lakes	55075	Wisconsin	Marinette	3.78092	0.67159	0.30053	0.58306	0.56018	0.42178	20
Great Lakes	55079	Wisconsin	Milwaukee	2.23809	0.66579	0.39088	0.56376	0.46711	0.36334	64
Great Lakes	55083	Wisconsin	Oconto	4.99102	0.8316	0.25532	0.49077	0.63393	0.39805	6
Great Lakes	55089	Wisconsin	Ozaukee	3.14487	0.66376	0.28089	0.34662	0.64574	0.46295	36
Great Lakes	55101	Wisconsin	Racine	2.6449	0.6659	0.27551	0.37369	0.5431	0.41939	53
Great Lakes	55117	Wisconsin	Sheboygan	4.74532	0.7114	0.22552	0.4602	0.61591	0.43418	9
Gulf of Mexico	1003	Alabama	Baldwin	2.08646	0.33821	0.3466	0.77211	0.44552	0.48988	22
Gulf of Mexico	1097	Alabama	Mobile	1.10537	0.23277	0.36359	0.64716	0.45671	0.44902	61
Gulf of Mexico	12005	Florida	Bay	2.81229	0.46424	0.26222	0.58816	0.51982	0.40641	6
Gulf of Mexico	12015	Florida	Charlotte	2.19249	0.50413	0.27459	0.51608	0.43797	0.38962	17
Gulf of Mexico	12017	Florida	Citrus	1.66321	0.49818	0.28831	0.42212	0.36061	0.45907	36
Gulf of Mexico	12021	Florida	Collier	2.76106	0.60421	0.38661	0.583	0.43719	0.55049	8
Gulf of Mexico	12029	Florida	Dixie	0.82574	0.38308	0.2706	0.28263	0.36077	0.45594	67
Gulf of Mexico	12033	Florida	Escambia	1.48239	0.37992	0.36138	0.51368	0.47307	0.45194	47
Gulf of Mexico	12037	Florida	Franklin	3.10338	0.43539	0.22015	0.28659	0.66686	0.6081	5
Gulf of Mexico	12045	Florida	Gulf	1.00059	0.20191	0.20952	0.30727	0.46057	0.53454	65
Gulf of Mexico	12053	Florida	Hernando	0.93257	0.40356	0.28571	0.34847	0.3741	0.4052	66
Gulf of Mexico	12057	Florida	Hillsborough	2.43754	0.53816	0.4238	0.86716	0.44525	0.29813	12
Gulf of Mexico	12065	Florida	Jefferson	2.48207	0.52872	0.2155	0.3156	0.55502	0.43924	11
Gulf of Mexico	12069	Florida	Lake	1.6057	0.32384	0.33516	0.67641	0.43004	0.41227	42
Gulf of Mexico	12071	Florida	Lee	1.98036	0.57856	0.40524	0.65265	0.42446	0.33079	26
Gulf of Mexico	12073	Florida	Leon	1.66786	0.32977	0.32755	0.5175	0.5413	0.49358	35
Gulf of Mexico	12075	Florida	Levy	2.16646	0.46324	0.2485	0.46989	0.42116	0.4401	18
Gulf of Mexico	12077	Florida	Liberty	0.71977	0.22687	0.2502	0.19545	0.26461	0.71286	68
Gulf of Mexico	12081	Florida	Manatee	1.16486	0.54739	0.35359	0.42255	0.44317	0.30721	55
Gulf of Mexico	12087	Florida	Monroe	1.08594	0.19854	0.3822	0.59472	0.48912	0.62797	62
Gulf of Mexico	12091	Florida	Okaloosa	1.62122	0.29624	0.31046	0.59468	0.48215	0.47442	39
Gulf of Mexico	12101	Florida	Pasco	1.46961	0.46457	0.38295	0.58769	0.37842	0.36653	48
Gulf of Mexico	12103	Florida	Pinellas	2.35168	0.5607	0.33724	0.59827	0.43638	0.39134	13
Gulf of Mexico	12105	Florida	Polk	2.12977	0.38794	0.34201	0.83447	0.42906	0.32945	21
Gulf of Mexico	12113	Florida	Santa Rosa	1.55364	0.33614	0.32484	0.55706	0.43998	0.4685	44
Gulf of Mexico	12115	Florida	Sarasota	1.61263	0.56038	0.34356	0.47557	0.51946	0.28487	41
Gulf of Mexico	12123	Florida	Taylor	1.87576	0.61687	0.24357	0.32552	0.3981	0.44361	27
Gulf of Mexico	12129	Florida	Wakulla	1.6438	0.33547	0.29836	0.35262	0.48273	0.63997	38
Gulf of Mexico	12131	Florida	Walton	1.1502	0.21594	0.28119	0.53805	0.42998	0.49563	57
Gulf of Mexico	22019	Louisiana	Calcasieu	2.71166	0.51011	0.43075	0.76991	0.55685	0.46498	10
Gulf of Mexico	22023	Louisiana	Cameron	1.39354	0.58284	0.50095	0.38597	0.51553	0.47015	52
Gulf of Mexico	22045	Louisiana	Iberia	1.12578	0.50589	0.45378	0.39924	0.4538	0.42866	60
Gulf of Mexico	22051	Louisiana	Jefferson	1.70206	0.63189	0.49518	0.48257	0.57787	0.37098	31
Gulf of Mexico	22057	Louisiana	Lafourche	1.35999	0.53771	0.52054	0.52122	0.48351	0.39742	53
Gulf of Mexico	22063	Louisiana	Livingston	1.99965	0.55313	0.35839	0.49532	0.47613	0.42289	25
Gulf of Mexico	22071	Louisiana	Orleans	1.02521	0.62597	0.46804	0.38848	0.39759	0.38629	64
Gulf of Mexico	22075	Louisiana	Plaquemines	1.40514	0.60306	0.54891	0.53209	0.48626	0.36815	51
Gulf of Mexico	22087	Louisiana	St. Bernard	1.48735	0.6927	0.47956	0.45026	0.51878	0.32952	46
Gulf of Mexico	22089	Louisiana	St. Charles	1.69503	0.62864	0.5364	0.43737	0.58927	0.45663	32
Gulf of Mexico	22093	Louisiana	St. James	1.62041	0.61655	0.45177	0.36234	0.54981	0.46417	40
Gulf of Mexico	22095	Louisiana	St. John the Baptist	1.56506	0.62069	0.49163	0.39237	0.59537	0.41649	43
Gulf of Mexico	22099	Louisiana	St. Martin	1.51509	0.51145	0.41262	0.41623	0.52864	0.43688	45
Gulf of Mexico	22101	Louisiana	St. Mary	1.77861	0.53436	0.45434	0.50111	0.54081	0.45304	30
Gulf of Mexico	22103	Louisiana	St. Tammany	1.645	0.40965	0.41067	0.59701	0.51785	0.42304	37
Gulf of Mexico	22105	Louisiana	Tangipahoa	2.25667	0.56855	0.35878	0.57297	0.43783	0.42152	16
Gulf of Mexico	22109	Louisiana	Terrebonne	1.26874	0.53521	0.47487	0.47496	0.49083	0.36411	54
Gulf of Mexico	22113	Louisiana	Vermilion	2.01074	0.65279	0.43831	0.49979	0.44316	0.46651	24
Gulf of Mexico	28045	Mississippi	Hancock	1.13664	0.44423	0.35816	0.43018	0.33628	0.451	58
Gulf of Mexico	28047	Mississippi	Harrison	1.44861	0.46373	0.37998	0.46224	0.4281	0.45293	50
Gulf of Mexico	28059	Mississippi	Jackson	1.87037	0.4059	0.32609	0.4731	0.39057	0.59948	28
Gulf of Mexico	48007	Texas	Aransas	1.68467	0.57259	0.32889	0.33419	0.40423	0.52163	33
Gulf of Mexico	48039	Texas	Brazoria	4.22022	0.66188	0.38408	0.7763	0.52368	0.54926	1
Gulf of Mexico	48057	Texas	Calhoun	1.79703	0.50474	0.33956	0.43549	0.42868	0.49039	29
Gulf of Mexico	48061	Texas	Cameron	3.60016	0.57517	0.37129	0.70242	0.38369	0.6904	3
Gulf of Mexico	48071	Texas	Chambers	2.1328	0.61495	0.41971	0.51116	0.4395	0.50005	20
Gulf of Mexico	48167	Texas	Galveston	2.01258	0.6104	0.47067	0.60782	0.47196	0.40844	23
Gulf of Mexico	48201	Texas	Harris	1.03005	0.61143	0.99	0.83741	0.49091	0.19155	63
Gulf of Mexico	48239	Texas	Jackson	2.14238	0.58578	0.31103	0.33742	0.53769	0.48061	19
Gulf of Mexico	48245	Texas	Jefferson	2.29798	0.53399	0.46213	0.69823	0.52149	0.44851	14
Gulf of Mexico	48261	Texas	Kenedy	1.12851	0.65566	0.26071	0.30435	0.27344	0.44743	59
Gulf of Mexico	48273	Texas	Kleberg	1.67938	0.59954	0.25227	0.31363	0.37909	0.45786	34
Gulf of Mexico	48321	Texas	Matagorda	2.28617	0.54478	0.29963	0.43992	0.43102	0.50342	15
Gulf of Mexico	48355	Texas	Nueces	3.56655	0.63902	0.3281	0.69866	0.47736	0.41923	4
Gulf of Mexico	48361	Texas	Orange	1.15919	0.5012	0.45644	0.44591	0.45769	0.3936	56
Gulf of Mexico	48391	Texas	Refugio	1.46869	0.6305	0.31287	0.26566	0.44307	0.46778	49
Gulf of Mexico	48409	Texas	San Patricio	2.73226	0.61545	0.26694	0.48926	0.40174	0.44391	9
Gulf of Mexico	48469	Texas	Victoria	3.82251	0.53276	0.23454	0.51231	0.54069	0.51035	2
Gulf of Mexico	48489	Texas	Willacy	2.812	0.56006	0.20504	0.2853	0.25682	0.71751	7
Mid-Atlantic	10001	Delaware	Kent	3.77271	0.63762	0.32377	0.56584	0.46298	0.60908	8
Mid-Atlantic	10003	Delaware	New Castle	2.21795	0.64666	0.45198	0.54565	0.52013	0.43672	56
Mid-Atlantic	10005	Delaware	Sussex	3.54596	0.5343	0.30738	0.64553	0.43426	0.59616	15
Mid-Atlantic	24003	Maryland	Anne Arundel	2.23761	0.64243	0.46513	0.53948	0.55264	0.44582	53
Mid-Atlantic	24005	Maryland	Baltimore	2.41939	0.57115	0.36675	0.56676	0.58518	0.36321	47
Mid-Atlantic	24009	Maryland	Calvert	2.47762	0.66442	0.37443	0.44041	0.54065	0.4718	46
Mid-Atlantic	24011	Maryland	Caroline	3.23323	0.62579	0.27157	0.38896	0.49389	0.56771	19
Mid-Atlantic	24015	Maryland	Cecil	2.19673	0.56675	0.35131	0.522	0.39782	0.48337	58
Mid-Atlantic	24017	Maryland	Charles	3.62262	0.67397	0.35283	0.56214	0.56489	0.52389	12
Mid-Atlantic	24019	Maryland	Dorchester	2.49021	0.58824	0.31857	0.37257	0.44706	0.60074	45
Mid-Atlantic	24025	Maryland	Harford	2.72614	0.62642	0.36834	0.51343	0.53061	0.48472	36
Mid-Atlantic	24029	Maryland	Kent	2.73947	0.52219	0.28069	0.42773	0.49207	0.55538	35
Mid-Atlantic	24033	Maryland	Prince George's	2.13463	0.65325	0.49319	0.56525	0.61046	0.36827	60
Mid-Atlantic	24035	Maryland	Queen Anne's	3.90571	0.58703	0.27949	0.53148	0.58113	0.52914	5
Mid-Atlantic	24037	Maryland	St. Mary's	3.56205	0.70274	0.33207	0.5207	0.48337	0.54718	14
Mid-Atlantic	24039	Maryland	Somerset	3.15283	0.67633	0.28923	0.4072	0.38994	0.60867	22
Mid-Atlantic	24041	Maryland	Talbot	2.98784	0.59375	0.3197	0.42151	0.56976	0.55546	24
Mid-Atlantic	24045	Maryland	Wicomico	3.11966	0.58253	0.29151	0.49775	0.50566	0.50463	23
Mid-Atlantic	24047	Maryland	Worcester	3.75003	0.58821	0.29009	0.55916	0.45281	0.5975	9
Mid-Atlantic	24510	Maryland	Baltimore city	0.20552	0.61107	0.53461	0.39311	0.38113	0.15582	88
Mid-Atlantic	34001	New Jersey	Atlantic	2.71251	0.63347	0.34521	0.51977	0.43089	0.50675	37
Mid-Atlantic	34003	New Jersey	Bergen	1.10836	0.60981	0.48759	0.46423	0.58609	0.20226	77
Mid-Atlantic	34005	New Jersey	Burlington	3.56715	0.67525	0.37034	0.56669	0.54694	0.55767	13
Mid-Atlantic	34007	New Jersey	Camden	1.34211	0.60595	0.40895	0.44436	0.50578	0.29591	74
Mid-Atlantic	34009	New Jersey	Cape May	2.66364	0.60935	0.31232	0.4008	0.46232	0.56471	39
Mid-Atlantic	34011	New Jersey	Cumberland	2.31903	0.59817	0.35833	0.43747	0.44432	0.54906	50
Mid-Atlantic	34013	New Jersey	Essex	0.66784	0.61774	0.49495	0.46736	0.53076	0.10028	83
Mid-Atlantic	34015	New Jersey	Gloucester	1.25648	0.57111	0.5	0.45274	0.48915	0.3791	76
Mid-Atlantic	34017	New Jersey	Hudson	0.65967	0.61796	0.52418	0.40243	0.46489	0.23324	84
Mid-Atlantic	34023	New Jersey	Middlesex	1.62233	0.64584	0.52763	0.60094	0.56115	0.25255	71
Mid-Atlantic	34025	New Jersey	Monmouth	2.96985	0.62707	0.39663	0.61456	0.5337	0.48463	26
Mid-Atlantic	34029	New Jersey	Ocean	2.96559	0.67524	0.41251	0.59578	0.44813	0.5462	27
Mid-Atlantic	34033	New Jersey	Salem	2.83029	0.70812	0.25985	0.33793	0.45911	0.50259	33
Mid-Atlantic	34035	New Jersey	Somerset	2.2315	0.6791	0.38209	0.48639	0.5725	0.33928	54
Mid-Atlantic	34039	New Jersey	Union	0.82743	0.65206	0.35753	0.38834	0.56118	0.12855	81
Mid-Atlantic	36001	New York	Albany	3.49905	0.69256	0.30601	0.54242	0.63927	0.34335	16
Mid-Atlantic	36005	New York	Bronx	0.13904	0.66773	0.46013	0.29722	0.40912	0.20326	89
Mid-Atlantic	36027	New York	Dutchess	2.84493	0.63787	0.3782	0.61242	0.58694	0.36649	31
Mid-Atlantic	36047	New York	Kings	0.76171	0.66358	0.4273	0.3098	0.50179	0.27611	82
Mid-Atlantic	36059	New York	Nassau	2.80638	0.59758	0.3675	0.56391	0.70289	0.34236	34
Mid-Atlantic	36061	New York	New York	0.39882	0.64083	0.66161	0.37562	0.45989	0.20619	86
Mid-Atlantic	36071	New York	Orange	3.37254	0.62253	0.35601	0.70417	0.59136	0.36184	18
Mid-Atlantic	36079	New York	Putnam	2.87584	0.6567	0.33193	0.40251	0.63278	0.46263	30
Mid-Atlantic	36081	New York	Queens	1.75946	0.54575	0.35979	0.46674	0.57756	0.31768	65
Mid-Atlantic	36085	New York	Richmond	1.79161	0.5623	0.32485	0.31402	0.57902	0.4313	63
Mid-Atlantic	36087	New York	Rockland	1.27941	0.61524	0.46617	0.34527	0.61782	0.33973	75
Mid-Atlantic	36103	New York	Suffolk	4.61508	0.60612	0.33717	0.73754	0.68263	0.51246	2
Mid-Atlantic	36111	New York	Ulster	4.35113	0.64809	0.27973	0.63567	0.54236	0.45466	3
Mid-Atlantic	36119	New York	Westchester	2.13964	0.61803	0.39505	0.5436	0.58876	0.30987	59
Mid-Atlantic	42017	Pennsylvania	Bucks	3.64051	0.64765	0.3483	0.72432	0.63359	0.31811	10
Mid-Atlantic	42045	Pennsylvania	Delaware	1.01483	0.56564	0.3841	0.38848	0.52581	0.25239	78
Mid-Atlantic	42101	Pennsylvania	Philadelphia	0.46402	0.56018	0.43217	0.5298	0.40314	0.0625	85
Mid-Atlantic	51001	Virginia	Accomack	3.88352	0.56227	0.28788	0.50358	0.53364	0.64969	6
Mid-Atlantic	51013	Virginia	Arlington	-0.1015	0.65507	0.39408	0.25701	0.49074	0.11787	92
Mid-Atlantic	51033	Virginia	Caroline	3.2275	0.61072	0.27433	0.47425	0.50286	0.48705	20
Mid-Atlantic	51036	Virginia	Charles City	2.59953	0.58347	0.26595	0.32892	0.5244	0.51969	42
Mid-Atlantic	51041	Virginia	Chesterfield	1.7038	0.59955	0.52867	0.50979	0.58145	0.40716	67
Mid-Atlantic	51057	Virginia	Essex	2.67341	0.48146	0.27167	0.343	0.68412	0.50846	38
Mid-Atlantic	51059	Virginia	Fairfax	1.63915	0.66858	0.45531	0.47407	0.5574	0.30808	70
Mid-Atlantic	51073	Virginia	Gloucester	2.572	0.47289	0.31034	0.34725	0.67786	0.58182	43
Mid-Atlantic	51085	Virginia	Hanover	2.6513	0.56687	0.32477	0.47426	0.6769	0.37617	40
Mid-Atlantic	51087	Virginia	Henrico	0.94831	0.58826	0.58038	0.37373	0.58844	0.31859	79
Mid-Atlantic	51093	Virginia	Isle of Wight	2.83419	0.62481	0.30575	0.39035	0.58482	0.487	32
Mid-Atlantic	51095	Virginia	James City	2.20912	0.6533	0.37646	0.32726	0.53914	0.54556	57
Mid-Atlantic	51097	Virginia	King and Queen	2.97085	0.58635	0.25461	0.30647	0.56878	0.55135	25
Mid-Atlantic	51099	Virginia	King George	3.3746	0.8608	0.30605	0.41767	0.4639	0.47786	17
Mid-Atlantic	51101	Virginia	King William	4.80342	0.77093	0.26672	0.39722	0.64782	0.54103	1
Mid-Atlantic	51103	Virginia	Lancaster	2.87698	0.54505	0.32628	0.32156	0.71061	0.59747	29
Mid-Atlantic	51115	Virginia	Mathews	3.82144	0.54974	0.27204	0.26414	0.70177	0.73543	7
Mid-Atlantic	51119	Virginia	Middlesex	3.63051	0.63992	0.28883	0.31669	0.63242	0.63119	11
Mid-Atlantic	51127	Virginia	New Kent	2.95083	0.55001	0.2932	0.42153	0.62165	0.49947	28
Mid-Atlantic	51131	Virginia	Northampton	3.21257	0.54514	0.27971	0.33485	0.56074	0.67273	21
Mid-Atlantic	51133	Virginia	Northumberland	4.12282	0.7538	0.2775	0.35474	0.61174	0.55731	4
Mid-Atlantic	51149	Virginia	Prince George	2.24069	0.55099	0.3672	0.44459	0.48173	0.55379	52
Mid-Atlantic	51153	Virginia	Prince William	1.43615	0.63364	0.5648	0.47184	0.59708	0.34543	72
Mid-Atlantic	51159	Virginia	Richmond	2.3187	0.53884	0.2768	0.34093	0.55028	0.48853	51
Mid-Atlantic	51177	Virginia	Spotsylvania	1.77077	0.67901	0.38467	0.38182	0.53896	0.37682	64
Mid-Atlantic	51179	Virginia	Stafford	1.92716	0.67447	0.43216	0.39278	0.56356	0.43949	61
Mid-Atlantic	51181	Virginia	Surry	1.90178	0.55609	0.29921	0.30498	0.49366	0.50449	62
Mid-Atlantic	51193	Virginia	Westmoreland	2.61919	0.66004	0.30452	0.2967	0.65063	0.46338	41
Mid-Atlantic	51199	Virginia	York	2.32337	0.57599	0.42311	0.32578	0.59473	0.67913	49
Mid-Atlantic	51510	Virginia	Alexandria city	-0.06751	0.62589	0.53978	0.25535	0.49513	0.11731	90
Mid-Atlantic	51550	Virginia	Chesapeake city	1.69732	0.52432	0.405	0.39757	0.54371	0.48115	68
Mid-Atlantic	51650	Virginia	Hampton city	1.74322	0.57184	0.36468	0.28525	0.48285	0.57047	66
Mid-Atlantic	51670	Virginia	Hopewell city	-0.0826	0.44158	0.7556	0.13593	0.46183	0.23959	91
Mid-Atlantic	51700	Virginia	Newport News city	1.69206	0.55838	0.36285	0.31073	0.46082	0.5555	69
Mid-Atlantic	51710	Virginia	Norfolk city	0.8655	0.53604	0.36075	0.29396	0.43316	0.3855	80
Mid-Atlantic	51735	Virginia	Poquoson city	2.23042	0.58952	0.24835	0.16464	0.5268	0.59616	55
Mid-Atlantic	51740	Virginia	Portsmouth city	0.3041	0.54433	0.46087	0.23797	0.48706	0.27099	87
Mid-Atlantic	51760	Virginia	Richmond city	-0.23353	0.59135	0.45692	0.24504	0.46291	0.10453	93
Mid-Atlantic	51800	Virginia	Suffolk city	2.55785	0.57426	0.31354	0.49438	0.48939	0.45436	44
Mid-Atlantic	51810	Virginia	Virginia Beach city	2.40189	0.50664	0.27083	0.37715	0.50903	0.51998	48
Mid-Atlantic	51830	Virginia	Williamsburg city	1.36268	0.87316	0.28407	0.21766	0.49124	0.36526	73
North Pacific	2013	Alaska	Aleutians East	148.066	0.76164	0.01	0.3417	0.30476	0.99	2
North Pacific	2016	Alaska	Aleutians West	110.995	0.79453	0.01	0.47904	0.42411	0.5233	4
North Pacific	2020	Alaska	Anchorage Municipality	40.076	0.99	0.05016	0.69298	0.557	0.44292	8
North Pacific	2060	Alaska	Bristol Bay	56.7588	0.94768	0.0206	0.30744	0.2338	0.79491	7
North Pacific	2070	Alaska	Dillingham	90.4103	0.64938	0.01	0.48912	0.4276	0.50767	5
North Pacific	2100	Alaska	Haines	139.653	0.77913	0.01	0.37066	0.59639	0.664	3
North Pacific	2105	Alaska	Hoonah-Angoon	14.9755	0.63766	0.04439	0.41567	0.3569	0.50156	13
North Pacific	2110	Alaska	Juneau City and	36.9498	0.77732	0.05511	0.5614	0.73109	0.68611	9
North Pacific	2122	Alaska	Kenai Peninsula	32.8881	0.78065	0.05515	0.71294	0.63034	0.48177	11
North Pacific	2130	Alaska	Ketchikan Gateway	27.9522	0.74319	0.05207	0.46444	0.61682	0.61356	12
North Pacific	2150	Alaska	Kodiak Island	189.172	0.7015	0.01	0.5571	0.47366	0.92761	1
North Pacific	2164	Alaska	Lake and Peninsula	76.6963	0.60556	0.01226	0.48794	0.24738	0.7184	6
North Pacific	2185	Alaska	North Slope	32.9975	0.6375	0.05927	0.74681	0.36541	0.9593	10
North Pacific	2195	Alaska	Petersburg	12.3298	0.7618	0.08393	0.31829	0.60408	0.53816	15
North Pacific	2198	Alaska	Prince of Wales-Hyder	11.6463	0.60831	0.08339	0.57317	0.44299	0.48729	17
North Pacific	2220	Alaska	Sitka City and	14.9016	0.76657	0.1103	0.39794	0.68145	0.70948	14
North Pacific	2261	Alaska	Valdez-Cordova	11.9588	0.6411	0.11728	0.68859	0.6032	0.47463	16
North Pacific	2275	Alaska	Wrangell City and	5.00321	0.52307	0.07606	0.26884	0.37316	0.51964	19
North Pacific	2282	Alaska	Yakutat City and	9.50136	0.66172	0.12783	0.25588	0.44893	0.92371	18
Northeast	9001	Connecticut	Fairfield	3.26078	0.62133	0.30865	0.67469	0.49394	0.34603	16
Northeast	9007	Connecticut	Middlesex	2.59033	0.63481	0.32066	0.39559	0.59791	0.43895	23
Northeast	9009	Connecticut	New Haven	3.24806	0.60868	0.32409	0.65902	0.49926	0.40333	17
Northeast	9011	Connecticut	New London	3.85476	0.61853	0.25553	0.58709	0.48989	0.43312	12
Northeast	23005	Maine	Cumberland	5.27013	0.71832	0.31173	0.67078	0.61458	0.52526	6
Northeast	23009	Maine	Hancock	12.695	0.67014	0.10711	0.54304	0.55914	0.60309	1
Northeast	23013	Maine	Knox	7.12469	0.5314	0.12354	0.34433	0.62149	0.61716	4
Northeast	23015	Maine	Lincoln	4.50128	0.77173	0.23573	0.30912	0.61285	0.54782	9
Northeast	23023	Maine	Sagadahoc	3.81696	0.72175	0.25185	0.30398	0.61469	0.5344	13
Northeast	23027	Maine	Waldo	8.72489	0.68435	0.10549	0.4096	0.53799	0.48644	3
Northeast	23029	Maine	Washington	6.45282	0.67232	0.20509	0.48298	0.62819	0.5884	5
Northeast	23031	Maine	York	4.3038	0.68488	0.28927	0.55319	0.54663	0.51617	11
Northeast	25001	Massachusetts	Barnstable	5.23369	0.62734	0.25778	0.58504	0.57977	0.5905	7
Northeast	25005	Massachusetts	Bristol	3.04012	0.64273	0.36332	0.57222	0.55209	0.4508	19
Northeast	25007	Massachusetts	Dukes	9.40398	0.53801	0.10461	0.2894	0.81133	0.59509	2
Northeast	25009	Massachusetts	Essex	3.68847	0.6416	0.36461	0.67135	0.56455	0.48693	14
Northeast	25017	Massachusetts	Middlesex	2.63105	0.66042	0.49436	0.81888	0.58461	0.25947	22
Northeast	25019	Massachusetts	Nantucket	2.68456	0.32276	0.14503	0.22032	0.57154	0.6085	21
Northeast	25021	Massachusetts	Norfolk	2.88782	0.6206	0.39831	0.63326	0.61821	0.38669	20
Northeast	25023	Massachusetts	Plymouth	4.51274	0.62364	0.29613	0.61373	0.59769	0.54194	8
Northeast	25025	Massachusetts	Suffolk	2.1142	0.64767	0.32837	0.41656	0.4648	0.42634	26
Northeast	33015	New Hampshire	Rockingham	3.07297	0.69079	0.37317	0.5777	0.55399	0.41956	18
Northeast	33017	New Hampshire	Strafford	2.19974	0.62565	0.29476	0.38033	0.5046	0.41937	25
Northeast	44001	Rhode Island	Bristol	1.1542	0.52248	0.33819	0.11013	0.58434	0.53099	28
Northeast	44003	Rhode Island	Kent	1.97522	0.70763	0.32911	0.24031	0.60463	0.44341	27
Northeast	44005	Rhode Island	Newport	3.51607	0.66856	0.24403	0.23203	0.55138	0.64326	15
Northeast	44007	Rhode Island	Providence	2.26122	0.63909	0.37007	0.5346	0.55082	0.32623	24
Northeast	44009	Rhode Island	Washington	4.35824	0.59476	0.24581	0.39069	0.63684	0.61356	10
Pacific	15001	Hawaii	Hawaii	11.3691	0.78069	0.16824	0.73979	0.62591	0.50766	2
Pacific	15003	Hawaii	Honolulu	11.5856	0.85955	0.19787	0.6975	0.639	0.63126	1
Pacific	15005	Hawaii	Kalawao	0.49633	0.42106	0.20324	0.2602	0.30752	0.38301	5
Pacific	15007	Hawaii	Kauai	8.88757	0.78901	0.16631	0.55934	0.73297	0.38324	4
Pacific	15009	Hawaii	Maui	9.81826	0.84574	0.17681	0.59496	0.63971	0.49204	3
Southeast	12009	Florida	Brevard	2.64534	0.52159	0.37586	0.67301	0.47008	0.48337	6
Southeast	12011	Florida	Broward	2.27328	0.52341	0.44698	0.71251	0.47922	0.44752	15
Southeast	12019	Florida	Clay	2.19398	0.52245	0.31472	0.41482	0.51521	0.48952	17
Southeast	12031	Florida	Duval	1.90609	0.50039	0.51562	0.80878	0.46984	0.35989	24
Southeast	12035	Florida	Flagler	1.69255	0.55376	0.31723	0.46118	0.44915	0.34886	37
Southeast	12061	Florida	Indian River	1.26755	0.42029	0.32522	0.46244	0.40165	0.39001	48
Southeast	12085	Florida	Martin	1.97012	0.55204	0.3434	0.49481	0.47621	0.39487	21
Southeast	12086	Florida	Miami-Dade	1.9802	0.37547	0.46084	0.83128	0.45623	0.53602	20
Southeast	12089	Florida	Nassau	1.73775	0.46464	0.29489	0.46411	0.46848	0.38444	35
Southeast	12095	Florida	Orange	1.2883	0.3913	0.54001	0.82002	0.46205	0.27822	46
Southeast	12099	Florida	Palm Beach	2.83269	0.52879	0.39253	0.81714	0.46978	0.40728	4
Southeast	12107	Florida	Putnam	1.26785	0.37524	0.28693	0.49464	0.33495	0.40375	47
Southeast	12109	Florida	St. Johns	1.88099	0.53322	0.41	0.53343	0.4475	0.46572	26
Southeast	12111	Florida	St. Lucie	0.98537	0.51834	0.3915	0.44889	0.39846	0.31103	50
Southeast	12117	Florida	Seminole	0.87015	0.35619	0.44389	0.50328	0.52411	0.29003	51
Southeast	12127	Florida	Volusia	2.68871	0.48168	0.34348	0.74126	0.42823	0.44731	5
Southeast	13025	Georgia	Brantley	0.84358	0.52517	0.24094	0.27774	0.35165	0.38871	52
Southeast	13029	Georgia	Bryan	2.4971	0.48801	0.26724	0.41055	0.52607	0.50409	8
Southeast	13039	Georgia	Camden	2.86752	0.72131	0.33512	0.39185	0.4776	0.54877	2
Southeast	13049	Georgia	Charlton	1.47349	0.5853	0.28535	0.23263	0.34213	0.57996	44
Southeast	13051	Georgia	Chatham	2.14385	0.51666	0.50121	0.62464	0.56628	0.52954	18
Southeast	13127	Georgia	Glynn	1.77249	0.4781	0.34618	0.3662	0.55249	0.49691	32
Southeast	13179	Georgia	Liberty	1.77264	0.54733	0.30131	0.39625	0.36636	0.48794	31
Southeast	13191	Georgia	McIntosh	0.55066	0.15417	0.29792	0.3275	0.45296	0.52918	53
Southeast	13305	Georgia	Wayne	1.5148	0.48664	0.19634	0.30821	0.44817	0.36974	41
Southeast	37013	North Carolina	Beaufort	2.10072	0.55994	0.40199	0.45897	0.51316	0.51913	19
Southeast	37015	North Carolina	Bertie	2.35793	0.55963	0.31784	0.38192	0.54519	0.50837	10
Southeast	37019	North Carolina	Brunswick	2.44031	0.52181	0.34179	0.58889	0.41782	0.49113	9
Southeast	37029	North Carolina	Camden	1.73854	0.53296	0.34303	0.33517	0.43729	0.5557	34
Southeast	37031	North Carolina	Carteret	2.33726	0.55547	0.43527	0.43971	0.48121	0.69704	12
Southeast	37041	North Carolina	Chowan	1.88245	0.5001	0.29378	0.28684	0.46332	0.58196	25
Southeast	37049	North Carolina	Craven	2.33809	0.53191	0.39496	0.51202	0.43597	0.61597	11
Southeast	37053	North Carolina	Currituck	2.24962	0.53994	0.33498	0.39718	0.42081	0.61415	16
Southeast	37055	North Carolina	Dare	2.84376	0.55202	0.40658	0.44375	0.55345	0.74192	3
Southeast	37073	North Carolina	Gates	1.79878	0.48596	0.30045	0.31835	0.48609	0.53218	28
Southeast	37091	North Carolina	Hertford	1.47519	0.52373	0.31233	0.36104	0.44298	0.42582	43
Southeast	37095	North Carolina	Hyde	1.53727	0.43455	0.45067	0.30486	0.58672	0.66249	40
Southeast	37129	North Carolina	New Hanover	1.64207	0.4977	0.42422	0.38857	0.53084	0.53721	38
Southeast	37133	North Carolina	Onslow	2.27734	0.57515	0.32882	0.45897	0.36353	0.55481	14
Southeast	37137	North Carolina	Pamlico	1.95976	0.5248	0.36311	0.30767	0.50152	0.63058	23
Southeast	37139	North Carolina	Pasquotank	1.74167	0.53863	0.31058	0.30884	0.44762	0.52934	33
Southeast	37141	North Carolina	Pender	3.78168	0.57918	0.2224	0.47058	0.49405	0.49904	1
Southeast	37143	North Carolina	Perquimans	1.77557	0.47997	0.28164	0.31463	0.38761	0.5863	30
Southeast	37177	North Carolina	Tyrrell	1.61209	0.6735	0.50248	0.24711	0.41747	0.70106	39
Southeast	37187	North Carolina	Washington	1.14262	0.45394	0.39072	0.26772	0.39911	0.60423	49
Southeast	45013	South Carolina	Beaufort	1.44171	0.48438	0.40168	0.37231	0.4926	0.5024	45
Southeast	45015	South Carolina	Berkeley	2.50187	0.57741	0.45259	0.56521	0.42821	0.65597	7
Southeast	45019	South Carolina	Charleston	2.33562	0.58748	0.49663	0.55284	0.50799	0.6111	13
Southeast	45029	South Carolina	Colleton	1.72743	0.5373	0.40164	0.41927	0.4962	0.48754	36
Southeast	45035	South Carolina	Dorchester	1.79341	0.61063	0.42677	0.40862	0.48916	0.48931	29
Southeast	45043	South Carolina	Georgetown	1.9683	0.38386	0.26456	0.4575	0.43174	0.52412	22
Southeast	45051	South Carolina	Horry	1.80183	0.44386	0.36552	0.53078	0.43339	0.49511	27
Southeast	45053	South Carolina	Jasper	1.50061	0.40271	0.25965	0.33147	0.52605	0.42723	42
West	6001	California	Alameda	1.84919	0.39359	0.38876	0.71952	0.54883	0.33763	38
West	6013	California	Contra Costa	1.62459	0.4028	0.47065	0.73375	0.52473	0.37064	44
West	6015	California	Del Norte	2.60988	0.52148	0.25222	0.4072	0.37409	0.58637	25
West	6023	California	Humboldt	4.62743	0.46238	0.25748	0.80518	0.51069	0.58033	2
West	6037	California	Los Angeles	2.71389	0.48644	0.41095	0.88106	0.53484	0.36326	23
West	6041	California	Marin	3.98792	0.44694	0.20003	0.41354	0.54475	0.65567	9
West	6045	California	Mendocino	3.70279	0.46575	0.2627	0.72343	0.53339	0.45227	14
West	6053	California	Monterey	1.22459	0.17487	0.34064	0.80852	0.49259	0.51334	46
West	6055	California	Napa	1.4874	0.30699	0.30891	0.45781	0.51812	0.51179	45
West	6059	California	Orange	1.82602	0.5433	0.55041	0.73579	0.57025	0.3124	41
West	6067	California	Sacramento	2.14328	0.5682	0.55687	0.76263	0.58984	0.36957	33
West	6073	California	San Diego	3.95407	0.54175	0.36789	0.90678	0.52009	0.50673	11
West	6075	California	San Francisco	3.74673	0.79235	0.35866	0.42912	0.53044	0.61407	13
West	6077	California	San Joaquin	2.28396	0.58981	0.40138	0.72356	0.44664	0.30416	29
West	6079	California	San Luis Obispo	3.3427	0.45199	0.35735	0.86055	0.60639	0.4707	17
West	6081	California	San Mateo	2.35481	0.42293	0.31243	0.55747	0.53945	0.48544	26
West	6083	California	Santa Barbara	4.09449	0.55592	0.39328	0.83009	0.55908	0.64473	8
West	6085	California	Santa Clara	1.89107	0.40564	0.41548	0.68225	0.55228	0.42019	37
West	6087	California	Santa Cruz	3.28824	0.45402	0.221	0.38178	0.53185	0.62549	18
West	6095	California	Solano	1.77869	0.43285	0.38597	0.60732	0.52207	0.38287	43
West	6097	California	Sonoma	2.89609	0.38112	0.31829	0.78313	0.56427	0.49714	22
West	6111	California	Ventura	4.09728	0.53402	0.35261	0.75056	0.55016	0.66031	7
West	6113	California	Yolo	2.33213	0.53778	0.36154	0.56425	0.5139	0.42867	27
West	41007	Oregon	Clatsop	2.24796	0.60363	0.27531	0.4122	0.461	0.41515	31
West	41009	Oregon	Columbia	1.8399	0.68569	0.35165	0.3996	0.40755	0.43827	40
West	41011	Oregon	Coos	2.12878	0.51111	0.29529	0.50921	0.41099	0.43312	34
West	41015	Oregon	Curry	1.78517	0.5677	0.39881	0.35349	0.48854	0.54985	42
West	41019	Oregon	Douglas	2.91556	0.5154	0.39014	0.83668	0.42929	0.46081	20
West	41039	Oregon	Lane	3.98044	0.64812	0.38338	0.87054	0.48454	0.43997	10
West	41041	Oregon	Lincoln	1.89619	0.60069	0.39688	0.47007	0.42147	0.4765	36
West	41051	Oregon	Multnomah	2.28343	0.54543	0.40306	0.5586	0.47581	0.51385	30
West	41057	Oregon	Tillamook	2.63828	0.63081	0.36957	0.48672	0.50003	0.51481	24
West	53009	Washington	Clallam	3.85895	0.58353	0.22276	0.508	0.51441	0.45074	12
West	53027	Washington	Grays Harbor	3.60856	0.61626	0.24766	0.59731	0.40011	0.43588	15
West	53029	Washington	Island	2.0294	0.82032	0.38645	0.37433	0.45636	0.43175	35
West	53031	Washington	Jefferson	2.17442	0.43725	0.29065	0.46835	0.51842	0.47926	32
West	53033	Washington	King	4.35615	0.68566	0.40269	0.86371	0.52142	0.50082	5
West	53035	Washington	Kitsap	1.84609	0.61881	0.34238	0.49851	0.44266	0.33465	39
West	53045	Washington	Mason	2.96035	0.56271	0.25767	0.49857	0.40605	0.49972	19
West	53049	Washington	Pacific	2.2986	0.59351	0.23061	0.44765	0.38704	0.38204	28
West	53053	Washington	Pierce	3.53049	0.65858	0.38651	0.72747	0.48934	0.47635	16
West	53055	Washington	San Juan	6.16284	0.71581	0.24544	0.43232	0.63809	0.69426	1
West	53057	Washington	Skagit	4.1716	0.67546	0.3098	0.56891	0.5066	0.56994	6
West	53061	Washington	Snohomish	4.60179	0.63443	0.35343	0.7216	0.54095	0.64141	3
West	53067	Washington	Thurston	2.90256	0.69626	0.40032	0.56371	0.52155	0.46423	21
West	53069	Washington	Wahkiakum	-0.4976	0.59453	0.26174	0.15343	0.20242	0.3962	47
West	53073	Washington	Whatcom	4.53411	0.63815	0.31912	0.69394	0.53277	0.55748	4

## Sheet: ENOW Regional Rescaled Results
Region	FIPS	State Name	County Name	CRSI	Governance	Risk	Built Environment	Society	Natural Environment	CRSI Rank within Region
Great Lakes	17031	Illinois	Cook	0.445424	0.29587	0.81626	0.95479	0.40575	0.13177	77
Great Lakes	17097	Illinois	Lake	0.945616	0.34167	0.59922	0.68703	0.4633	0.66819	62
Great Lakes	18089	Indiana	Lake	0.153996	0.24411	0.99	0.57044	0.39954	0.28226	80
Great Lakes	18091	Indiana	LaPorte	0.757425	0.34532	0.28534	0.46297	0.39958	0.42562	68
Great Lakes	18127	Indiana	Porter	0.759622	0.21022	0.46564	0.68637	0.52448	0.598	67
Great Lakes	26001	Michigan	Alcona	4.33922	0.74275	0.12064	0.30765	0.28335	0.84279	33
Great Lakes	26003	Michigan	Alger	3.64715	0.50056	0.15675	0.12877	0.62351	0.86977	36
Great Lakes	26005	Michigan	Allegan	8.20091	0.51408	0.10023	0.62397	0.56659	0.57085	11
Great Lakes	26007	Michigan	Alpena	5.06039	0.73356	0.13803	0.32483	0.38314	0.83083	24
Great Lakes	26009	Michigan	Antrim	3.31782	0.75009	0.18176	0.45922	0.35797	0.59745	37
Great Lakes	26011	Michigan	Arenac	4.64273	0.81269	0.06404	0.34187	0.29014	0.58131	29
Great Lakes	26013	Michigan	Baraga	0.864618	0.37931	0.49521	0.24535	0.54604	0.81557	64
Great Lakes	26017	Michigan	Bay	5.01628	0.61884	0.08747	0.38174	0.47073	0.48436	25
Great Lakes	26019	Michigan	Benzie	3.1776	0.68654	0.20001	0.4466	0.51397	0.46971	38
Great Lakes	26021	Michigan	Berrien	0.830122	0.44151	0.22371	0.5333	0.14462	0.56465	65
Great Lakes	26029	Michigan	Charlevoix	1.71706	0.74244	0.20049	0.41454	0.51631	0.22741	53
Great Lakes	26031	Michigan	Cheboygan	5.81864	0.679	0.13745	0.4818	0.42389	0.70294	21
Great Lakes	26033	Michigan	Chippewa	4.39998	0.68713	0.11797	0.49352	0.37644	0.49648	31
Great Lakes	26041	Michigan	Delta	6.76792	0.62502	0.14371	0.4159	0.60662	0.76469	15
Great Lakes	26047	Michigan	Emmet	7.91662	0.65319	0.17518	0.49536	0.6575	0.9335	13
Great Lakes	26053	Michigan	Gogebic	2.46498	0.61186	0.20718	0.08837	0.47139	0.94927	41
Great Lakes	26055	Michigan	Grand Traverse	5.82204	0.58181	0.15466	0.51289	0.63875	0.58579	20
Great Lakes	26061	Michigan	Houghton	0.62101	0.26851	0.23475	0.21399	0.43468	0.65628	71
Great Lakes	26063	Michigan	Huron	13.9134	0.92517	0.0813	0.52703	0.66338	0.33443	2
Great Lakes	26069	Michigan	Iosco	5.55911	0.68129	0.10557	0.33938	0.35468	0.79613	23
Great Lakes	26083	Michigan	Keweenaw	-1.21737	0.99	0.43884	0.20612	0.01	0.60238	85
Great Lakes	26089	Michigan	Leelanau	1.3556	0.7505	0.58859	0.4681	0.59207	0.41544	56
Great Lakes	26095	Michigan	Luce	-0.0450257	0.79889	0.38373	0.0731	0.24603	0.76368	82
Great Lakes	26097	Michigan	Mackinac	3.90831	0.7013	0.16037	0.44492	0.37374	0.64903	35
Great Lakes	26099	Michigan	Macomb	0.410125	0.55563	0.44871	0.4741	0.38618	0.25008	78
Great Lakes	26101	Michigan	Manistee	2.39447	0.67142	0.18201	0.27818	0.45145	0.61228	43
Great Lakes	26103	Michigan	Marquette	1.09785	0.30953	0.61054	0.61976	0.66218	0.78763	57
Great Lakes	26105	Michigan	Mason	4.79384	0.82315	0.11312	0.2859	0.40736	0.66975	28
Great Lakes	26109	Michigan	Menominee	2.14048	0.8956	0.13876	0.27067	0.30789	0.63005	48
Great Lakes	26115	Michigan	Monroe	0.680949	0.47781	0.22724	0.48476	0.43384	0.16463	69
Great Lakes	26121	Michigan	Muskegon	1.04365	0.48378	0.17622	0.36343	0.25592	0.60938	59
Great Lakes	26127	Michigan	Oceana	24.662	0.6157	0.01	0.38053	0.39153	0.409	1
Great Lakes	26131	Michigan	Ontonagon	0.50255	0.67883	0.48996	0.01	0.41414	0.84594	73
Great Lakes	26139	Michigan	Ottawa	8.92195	0.64662	0.12778	0.77281	0.60633	0.41761	9
Great Lakes	26141	Michigan	Presque Isle	2.21801	0.79216	0.21683	0.3421	0.28865	0.73009	45
Great Lakes	26145	Michigan	Saginaw	2.43438	0.49612	0.13496	0.53705	0.34609	0.42446	42
Great Lakes	26147	Michigan	St. Clair	5.89005	0.63598	0.11583	0.54816	0.32156	0.69427	18
Great Lakes	26151	Michigan	Sanilac	11.2613	0.87398	0.07027	0.43828	0.34536	0.70478	6
Great Lakes	26153	Michigan	Schoolcraft	2.19213	0.51241	0.1795	0.23402	0.27547	0.99	46
Great Lakes	26157	Michigan	Tuscola	9.67446	0.66033	0.08575	0.53149	0.42688	0.68057	8
Great Lakes	26159	Michigan	Van Buren	0.663998	0.36671	0.19317	0.50053	0.33823	0.29354	70
Great Lakes	26163	Michigan	Wayne	-0.223884	0.5194	0.47601	0.63048	0.13543	0.06722	83
Great Lakes	27031	Minnesota	Cook	5.82393	0.57117	0.18907	0.26515	0.99	0.6538	19
Great Lakes	27075	Minnesota	Lake	3.91606	0.38895	0.18559	0.2914	0.77875	0.87903	34
Great Lakes	27137	Minnesota	St. Louis	4.84058	0.4285	0.23327	0.99	0.62948	0.62835	27
Great Lakes	36011	New York	Cayuga	4.59089	0.43501	0.09525	0.41661	0.57123	0.4777	30
Great Lakes	36013	New York	Chautauqua	1.04885	0.14942	0.10488	0.52688	0.22922	0.64687	58
Great Lakes	36029	New York	Erie	2.11094	0.48705	0.34438	0.73602	0.53862	0.39654	49
Great Lakes	36045	New York	Jefferson	11.304	0.66382	0.09318	0.743	0.38549	0.65934	5
Great Lakes	36055	New York	Monroe	2.15311	0.46567	0.27138	0.58299	0.45758	0.56828	47
Great Lakes	36063	New York	Niagara	1.52495	0.5646	0.28102	0.41449	0.36973	0.61294	55
Great Lakes	36073	New York	Orleans	0.461904	0.64116	0.19335	0.16141	0.31236	0.65155	76
Great Lakes	36075	New York	Oswego	1.7251	0.48822	0.12898	0.62455	0.18417	0.40953	52
Great Lakes	36089	New York	St. Lawrence	5.76926	0.53552	0.11581	0.706	0.29121	0.63391	22
Great Lakes	36117	New York	Wayne	2.38925	0.56195	0.09572	0.40582	0.31919	0.48078	44
Great Lakes	39007	Ohio	Ashtabula	0.480235	0.26758	0.21958	0.40017	0.33432	0.4592	75
Great Lakes	39035	Ohio	Cuyahoga	0.199537	0.19818	0.52632	0.6708	0.38094	0.1175	79
Great Lakes	39043	Ohio	Erie	1.60653	0.31002	0.17346	0.50363	0.4556	0.45951	54
Great Lakes	39085	Ohio	Lake	0.549554	0.31857	0.35759	0.28742	0.60883	0.35974	72
Great Lakes	39093	Ohio	Lorain	0.486232	0.26076	0.31999	0.49856	0.39335	0.36935	74
Great Lakes	39095	Ohio	Lucas	-0.310975	0.36629	0.46929	0.35172	0.35611	0.01	84
Great Lakes	39123	Ohio	Ottawa	0.886337	0.39729	0.3282	0.39736	0.58449	0.31826	63
Great Lakes	39143	Ohio	Sandusky	1.00459	0.19929	0.17384	0.45669	0.5856	0.32578	60
Great Lakes	39173	Ohio	Wood	1.77293	0.46002	0.29235	0.68189	0.47055	0.34083	51
Great Lakes	42049	Pennsylvania	Erie	0.0561729	0.01	0.24283	0.65391	0.43185	0.57684	81
Great Lakes	55003	Wisconsin	Ashland	12.6655	0.89199	0.13231	0.25167	0.83285	0.86205	3
Great Lakes	55007	Wisconsin	Bayfield	7.4214	0.7957	0.17307	0.19885	0.74873	0.88891	14
Great Lakes	55009	Wisconsin	Brown	2.74811	0.65063	0.49557	0.76701	0.63696	0.58353	40
Great Lakes	55029	Wisconsin	Door	8.33896	0.56455	0.16047	0.64057	0.96501	0.4603	10
Great Lakes	55031	Wisconsin	Douglas	5.00279	0.73094	0.25312	0.36781	0.6834	0.82835	26
Great Lakes	55051	Wisconsin	Iron	6.67781	0.88249	0.12712	0.24215	0.53863	0.72852	16
Great Lakes	55059	Wisconsin	Kenosha	0.974873	0.29374	0.33914	0.47992	0.43489	0.6581	61
Great Lakes	55061	Wisconsin	Kewaunee	8.05181	0.67485	0.17355	0.37061	0.81728	0.84304	12
Great Lakes	55071	Wisconsin	Manitowoc	2.85099	0.69346	0.45348	0.48326	0.71483	0.71146	39
Great Lakes	55075	Wisconsin	Marinette	6.54665	0.62376	0.16892	0.59023	0.57357	0.7118	17
Great Lakes	55079	Wisconsin	Milwaukee	0.788157	0.42448	0.47648	0.51057	0.3756	0.55382	66
Great Lakes	55083	Wisconsin	Oconto	10.5226	0.95503	0.17563	0.5655	0.70826	0.65464	7
Great Lakes	55089	Wisconsin	Ozaukee	4.38291	0.47575	0.19868	0.45019	0.67132	0.79559	32
Great Lakes	55101	Wisconsin	Racine	1.89777	0.38386	0.21748	0.40192	0.55517	0.56233	50
Great Lakes	55117	Wisconsin	Sheboygan	11.8674	0.59365	0.10044	0.51264	0.73522	0.73134	4
Gulf of Mexico	1003	Alabama	Baldwin	9.82514	0.47041	0.11833	0.88983	0.62561	0.58463	11
Gulf of Mexico	1097	Alabama	Mobile	3.27424	0.23353	0.14427	0.65435	0.61483	0.63236	39
Gulf of Mexico	12005	Florida	Bay	13.4952	0.4137	0.04851	0.58611	0.77878	0.37473	7
Gulf of Mexico	12015	Florida	Charlotte	3.29489	0.50638	0.12744	0.54254	0.64113	0.19449	37
Gulf of Mexico	12017	Florida	Citrus	6.54191	0.45933	0.07277	0.43265	0.4023	0.58873	15
Gulf of Mexico	12021	Florida	Collier	4.07152	0.64436	0.22347	0.5777	0.64261	0.41655	31
Gulf of Mexico	12029	Florida	Dixie	2.90922	0.47854	0.03469	0.12299	0.35126	0.57644	45
Gulf of Mexico	12033	Florida	Escambia	2.92711	0.33592	0.1988	0.50912	0.66161	0.613	44
Gulf of Mexico	12037	Florida	Franklin	64.491	0.52382	0.01461	0.07596	0.98435	0.82304	3
Gulf of Mexico	12045	Florida	Gulf	25.5961	0.26416	0.01	0.14839	0.5343	0.74101	4
Gulf of Mexico	12053	Florida	Hernando	4.01953	0.31296	0.06051	0.46337	0.38358	0.45746	32
Gulf of Mexico	12057	Florida	Hillsborough	3.27578	0.55537	0.27951	0.95574	0.55491	0.20903	38
Gulf of Mexico	12065	Florida	Jefferson	75.4645	0.80701	0.01	0.16295	0.87024	0.4426	2
Gulf of Mexico	12069	Florida	Lake	4.40472	0.42098	0.11576	0.70371	0.60821	0.22728	26
Gulf of Mexico	12071	Florida	Lee	2.24179	0.56247	0.21053	0.64855	0.58946	0.13288	49
Gulf of Mexico	12073	Florida	Leon	5.87767	0.31001	0.10786	0.6163	0.91891	0.43756	18
Gulf of Mexico	12075	Florida	Levy	9.32974	0.63278	0.04066	0.36074	0.5111	0.38051	12
Gulf of Mexico	12077	Florida	Liberty	0.198483	0.42942	0.07186	0.04916	0.01	0.84518	66
Gulf of Mexico	12081	Florida	Manatee	1.6708	0.54751	0.16825	0.43165	0.63226	0.17361	52
Gulf of Mexico	12087	Florida	Monroe	0.345883	0.01	0.05792	0.58405	0.82346	0.52814	65
Gulf of Mexico	12091	Florida	Okaloosa	4.13093	0.33234	0.15404	0.60009	0.71445	0.55963	30
Gulf of Mexico	12101	Florida	Pasco	2.60061	0.44954	0.16004	0.58644	0.406	0.38098	48
Gulf of Mexico	12103	Florida	Pinellas	3.18433	0.52905	0.19317	0.53597	0.63387	0.35503	40
Gulf of Mexico	12105	Florida	Polk	3.74208	0.41513	0.15364	0.99	0.54359	0.0663	34
Gulf of Mexico	12113	Florida	Santa Rosa	3.43175	0.4705	0.20563	0.57423	0.49774	0.57489	35
Gulf of Mexico	12115	Florida	Sarasota	2.75853	0.57742	0.14752	0.38018	0.99	0.02461	46
Gulf of Mexico	12123	Florida	Taylor	5.78312	0.73647	0.01502	0.04987	0.40044	0.56985	19
Gulf of Mexico	12129	Florida	Wakulla	5.21677	0.29923	0.10459	0.2404	0.62998	0.95078	21
Gulf of Mexico	12131	Florida	Walton	5.91295	0.26873	0.05808	0.50878	0.54766	0.50273	17
Gulf of Mexico	22019	Louisiana	Calcasieu	6.06178	0.48855	0.1872	0.74772	0.7738	0.54392	16
Gulf of Mexico	22023	Louisiana	Cameron	0.676859	0.6886	0.67172	0.35078	0.49371	0.43149	60
Gulf of Mexico	22045	Louisiana	Iberia	0.469111	0.51638	0.20543	0.28126	0.44208	0.33281	63
Gulf of Mexico	22051	Louisiana	Jefferson	2.66947	0.73613	0.24004	0.37264	0.82249	0.23978	47
Gulf of Mexico	22057	Louisiana	Lafourche	1.62967	0.66	0.24654	0.43245	0.51546	0.30853	53
Gulf of Mexico	22063	Louisiana	Livingston	3.97697	0.66761	0.13879	0.55284	0.53372	0.26886	33
Gulf of Mexico	22071	Louisiana	Orleans	0.354391	0.70881	0.24448	0.29049	0.4144	0.31701	64
Gulf of Mexico	22075	Louisiana	Plaquemines	0.493628	0.71321	0.69512	0.42359	0.63998	0.16124	62
Gulf of Mexico	22087	Louisiana	St. Bernard	1.21647	0.95113	0.31766	0.4411	0.54993	0.18229	56
Gulf of Mexico	22089	Louisiana	St. Charles	3.0085	0.81571	0.30558	0.47822	0.83256	0.23878	42
Gulf of Mexico	22093	Louisiana	St. James	1.07339	0.82117	0.30165	0.30831	0.59025	0.27916	58
Gulf of Mexico	22095	Louisiana	St. John the Baptist	1.72182	0.78888	0.46158	0.39192	0.85676	0.25369	51
Gulf of Mexico	22099	Louisiana	St. Martin	1.16924	0.57141	0.25003	0.31956	0.71332	0.22146	57
Gulf of Mexico	22101	Louisiana	St. Mary	2.98878	0.68067	0.2202	0.39365	0.67662	0.37798	43
Gulf of Mexico	22103	Louisiana	St. Tammany	4.48356	0.53118	0.17774	0.67097	0.65759	0.3493	23
Gulf of Mexico	22105	Louisiana	Tangipahoa	4.28272	0.71939	0.12244	0.61237	0.44449	0.2365	28
Gulf of Mexico	22109	Louisiana	Terrebonne	1.38474	0.5754	0.16629	0.39329	0.54853	0.2291	54
Gulf of Mexico	22113	Louisiana	Vermilion	3.06499	0.80658	0.23377	0.35475	0.40473	0.5999	41
Gulf of Mexico	28045	Mississippi	Hancock	1.21864	0.53699	0.19399	0.46139	0.21384	0.4456	55
Gulf of Mexico	28047	Mississippi	Harrison	4.25925	0.52812	0.16229	0.5013	0.46309	0.59161	29
Gulf of Mexico	28059	Mississippi	Jackson	7.54018	0.4339	0.10228	0.46575	0.33239	0.94022	14
Gulf of Mexico	48007	Texas	Aransas	5.47911	0.48396	0.07045	0.28743	0.47716	0.56983	20
Gulf of Mexico	48039	Texas	Brazoria	14.706	0.81935	0.17553	0.88958	0.71997	0.81097	5
Gulf of Mexico	48057	Texas	Calhoun	4.43364	0.45762	0.08362	0.30244	0.47175	0.56457	24
Gulf of Mexico	48061	Texas	Cameron	13.5051	0.62537	0.12378	0.7923	0.36085	0.98462	6
Gulf of Mexico	48071	Texas	Chambers	2.05413	0.77993	0.45549	0.41842	0.56663	0.54423	50
Gulf of Mexico	48167	Texas	Galveston	3.30786	0.61828	0.28588	0.59958	0.55578	0.51599	36
Gulf of Mexico	48201	Texas	Harris	0.849345	0.60284	0.99	0.95805	0.65991	0.01	59
Gulf of Mexico	48239	Texas	Jackson	11.559	0.75852	0.07216	0.16564	0.77861	0.58623	9
Gulf of Mexico	48245	Texas	Jefferson	4.41437	0.46523	0.20039	0.64735	0.77334	0.45881	25
Gulf of Mexico	48261	Texas	Kenedy	-22.1997	0.84674	0.01936	0.27376	0.07935	0.32216	68
Gulf of Mexico	48273	Texas	Kleberg	-0.350268	0.65738	0.02524	0.21086	0.29247	0.43487	67
Gulf of Mexico	48321	Texas	Matagorda	9.83374	0.52941	0.07079	0.29342	0.51986	0.75938	10
Gulf of Mexico	48355	Texas	Nueces	8.23754	0.56045	0.13972	0.7651	0.6173	0.53201	13
Gulf of Mexico	48361	Texas	Orange	0.49595	0.5443	0.21425	0.3092	0.54604	0.22521	61
Gulf of Mexico	48391	Texas	Refugio	4.9887	0.99	0.05693	0.01	0.45059	0.64514	22
Gulf of Mexico	48409	Texas	San Patricio	13.2386	0.58522	0.04557	0.43623	0.40902	0.57725	8
Gulf of Mexico	48469	Texas	Victoria	107.829	0.5422	0.01	0.53526	0.82662	0.56847	1
Gulf of Mexico	48489	Texas	Willacy	4.3453	0.66	0.09412	0.07163	0.12612	0.99	27
Mid-Atlantic	10001	Delaware	Kent	3.88936	0.56747	0.20445	0.53467	0.38676	0.83177	15
Mid-Atlantic	10003	Delaware	New Castle	1.54873	0.51716	0.47236	0.54999	0.56559	0.61489	43
Mid-Atlantic	10005	Delaware	Sussex	2.26386	0.21223	0.16908	0.73168	0.32351	0.84135	29
Mid-Atlantic	24003	Maryland	Anne Arundel	2.11853	0.53638	0.44486	0.66004	0.5883	0.6281	33
Mid-Atlantic	24005	Maryland	Baltimore	1.92169	0.3253	0.27548	0.67991	0.61308	0.48842	36
Mid-Atlantic	24009	Maryland	Calvert	2.71696	0.62711	0.3575	0.56762	0.57112	0.66419	25
Mid-Atlantic	24011	Maryland	Caroline	1.39792	0.62769	0.11661	0.25055	0.31414	0.65368	48
Mid-Atlantic	24015	Maryland	Cecil	0.613529	0.2298	0.21793	0.55485	0.1159	0.59571	66
Mid-Atlantic	24017	Maryland	Charles	3.02207	0.64213	0.38957	0.63628	0.594	0.70664	21
Mid-Atlantic	24019	Maryland	Dorchester	0.229866	0.65278	0.20961	0.16771	0.17827	0.8218	73
Mid-Atlantic	24025	Maryland	Harford	2.34768	0.41644	0.25743	0.5895	0.52065	0.62576	27
Mid-Atlantic	24029	Maryland	Kent	2.79815	0.31713	0.09488	0.32945	0.41781	0.77096	24
Mid-Atlantic	24033	Maryland	Prince George's	1.54303	0.52928	0.61469	0.67273	0.72445	0.47679	44
Mid-Atlantic	24035	Maryland	Queen Anne's	12.4413	0.52622	0.07287	0.52369	0.65748	0.74453	4
Mid-Atlantic	24037	Maryland	St. Mary's	3.39137	0.66133	0.26241	0.58165	0.36414	0.74847	18
Mid-Atlantic	24039	Maryland	Somerset	-1.7533	0.62946	0.0828	0.14249	0.01	0.86178	92
Mid-Atlantic	24041	Maryland	Talbot	6.41601	0.53159	0.12877	0.40681	0.68817	0.78993	8
Mid-Atlantic	24045	Maryland	Wicomico	2.32696	0.19653	0.10137	0.47752	0.43907	0.73849	28
Mid-Atlantic	24047	Maryland	Worcester	3.01409	0.18721	0.08825	0.60067	0.30107	0.83594	22
Mid-Atlantic	24510	Maryland	Baltimore city	-0.807053	0.34249	0.43877	0.20517	0.09314	0.17082	89
Mid-Atlantic	34001	New Jersey	Atlantic	0.968205	0.44661	0.3575	0.47181	0.24402	0.70277	59
Mid-Atlantic	34003	New Jersey	Bergen	1.11302	0.55252	0.52218	0.43979	0.79811	0.30263	56
Mid-Atlantic	34005	New Jersey	Burlington	3.60254	0.64495	0.31205	0.61448	0.60829	0.66889	16
Mid-Atlantic	34007	New Jersey	Camden	0.745819	0.47254	0.34632	0.39292	0.4841	0.41589	64
Mid-Atlantic	34009	New Jersey	Cape May	0.451875	0.40533	0.66326	0.38876	0.31955	0.727	69
Mid-Atlantic	34011	New Jersey	Cumberland	1.31508	0.53115	0.20643	0.41083	0.18255	0.7044	51
Mid-Atlantic	34013	New Jersey	Essex	0.190047	0.45559	0.41087	0.34435	0.56359	0.17042	74
Mid-Atlantic	34015	New Jersey	Gloucester	0.463481	0.4507	0.61111	0.43316	0.41489	0.48087	68
Mid-Atlantic	34017	New Jersey	Hudson	-0.166695	0.50739	0.40654	0.26259	0.33988	0.36168	84
Mid-Atlantic	34023	New Jersey	Middlesex	1.39876	0.51845	0.58708	0.69244	0.65348	0.39625	47
Mid-Atlantic	34025	New Jersey	Monmouth	1.10766	0.47155	0.72877	0.61367	0.60573	0.65371	57
Mid-Atlantic	34029	New Jersey	Ocean	0.762228	0.60772	0.99	0.60311	0.30549	0.71597	62
Mid-Atlantic	34033	New Jersey	Salem	-1.64546	0.81457	0.11789	0.14897	0.14869	0.69105	91
Mid-Atlantic	34035	New Jersey	Somerset	2.16335	0.66464	0.31381	0.50862	0.66009	0.33008	31
Mid-Atlantic	34039	New Jersey	Union	1.87013	0.48956	0.11206	0.31684	0.69551	0.22496	37
Mid-Atlantic	36001	New York	Albany	10.0039	0.71564	0.11932	0.56528	0.94579	0.32085	5
Mid-Atlantic	36005	New York	Bronx	-1.59984	0.63105	0.42933	0.15818	0.10855	0.19391	90
Mid-Atlantic	36027	New York	Dutchess	4.9703	0.64517	0.23401	0.68916	0.75017	0.42865	13
Mid-Atlantic	36047	New York	Kings	-0.266294	0.53151	0.23149	0.20679	0.46038	0.32532	85
Mid-Atlantic	36059	New York	Nassau	4.56267	0.41423	0.18383	0.57433	0.99	0.47835	14
Mid-Atlantic	36061	New York	New York	-0.123857	0.53153	0.67268	0.24156	0.47448	0.22926	83
Mid-Atlantic	36071	New York	Orange	8.05584	0.62854	0.15758	0.81279	0.75852	0.35858	6
Mid-Atlantic	36079	New York	Putnam	17.0808	0.66454	0.06436	0.49631	0.82481	0.55721	3
Mid-Atlantic	36081	New York	Queens	2.02675	0.33869	0.15422	0.41683	0.69185	0.37822	35
Mid-Atlantic	36085	New York	Richmond	1.61552	0.38001	0.17525	0.20449	0.71734	0.57459	41
Mid-Atlantic	36087	New York	Rockland	1.23028	0.56459	0.47967	0.32789	0.86811	0.39658	54
Mid-Atlantic	36103	New York	Suffolk	7.94907	0.44978	0.18995	0.99	0.95657	0.68609	7
Mid-Atlantic	36111	New York	Ulster	110.632	0.74098	0.01	0.64523	0.60447	0.46949	1
Mid-Atlantic	36119	New York	Westchester	2.99009	0.55929	0.31747	0.59662	0.81026	0.44177	23
Mid-Atlantic	42017	Pennsylvania	Bucks	5.23011	0.59442	0.28105	0.87193	0.95332	0.32753	11
Mid-Atlantic	42045	Pennsylvania	Delaware	0.239701	0.33718	0.33374	0.31397	0.56537	0.25728	72
Mid-Atlantic	42101	Pennsylvania	Philadelphia	-0.443611	0.33823	0.31522	0.42655	0.172	0.11764	86
Mid-Atlantic	51001	Virginia	Accomack	3.18754	0.42054	0.13246	0.34282	0.38029	0.89552	19
Mid-Atlantic	51013	Virginia	Arlington	-1.89845	0.45761	0.20913	0.10796	0.46481	0.01	93
Mid-Atlantic	51033	Virginia	Caroline	5.68415	0.57116	0.04803	0.40303	0.29881	0.56555	10
Mid-Atlantic	51036	Virginia	Charles City	6.40153	0.50778	0.03294	0.23723	0.37189	0.70639	9
Mid-Atlantic	51041	Virginia	Chesterfield	0.737391	0.33135	0.74436	0.61485	0.69836	0.51342	65
Mid-Atlantic	51057	Virginia	Essex	1.76726	0.35383	0.19459	0.2121	0.70697	0.71499	39
Mid-Atlantic	51059	Virginia	Fairfax	1.63567	0.52973	0.4418	0.53967	0.70781	0.44012	40
Mid-Atlantic	51073	Virginia	Gloucester	2.10993	0.31199	0.2598	0.2716	0.94424	0.84164	34
Mid-Atlantic	51085	Virginia	Hanover	3.49835	0.41335	0.18915	0.50286	0.94846	0.37474	17
Mid-Atlantic	51087	Virginia	Henrico	0.361389	0.33282	0.84939	0.39834	0.76419	0.32577	70
Mid-Atlantic	51093	Virginia	Isle of Wight	0.479841	0.40156	0.73699	0.26256	0.63067	0.66442	67
Mid-Atlantic	51095	Virginia	James City	1.36906	0.41963	0.40087	0.37439	0.60486	0.7819	50
Mid-Atlantic	51097	Virginia	King and Queen	1.46758	0.51003	0.03697	0.19534	0.3237	0.63498	45
Mid-Atlantic	51099	Virginia	King George	3.09292	0.99	0.12733	0.3391	0.2748	0.64371	20
Mid-Atlantic	51101	Virginia	King William	23.8878	0.83708	0.04086	0.27437	0.76962	0.66667	2
Mid-Atlantic	51103	Virginia	Lancaster	1.79376	0.52155	0.40343	0.20767	0.84333	0.82674	38
Mid-Atlantic	51115	Virginia	Mathews	1.42145	0.40615	0.40727	0.12026	0.8418	0.99	46
Mid-Atlantic	51119	Virginia	Middlesex	1.39231	0.62046	0.32687	0.19117	0.54263	0.78476	49
Mid-Atlantic	51127	Virginia	New Kent	5.02542	0.38961	0.07908	0.34571	0.62737	0.62327	12
Mid-Atlantic	51131	Virginia	Northampton	0.280053	0.42488	0.4755	0.08069	0.35307	0.91156	71
Mid-Atlantic	51133	Virginia	Northumberland	2.58544	0.76092	0.24573	0.24944	0.55233	0.74478	26
Mid-Atlantic	51149	Virginia	Prince George	0.773564	0.28271	0.24746	0.37836	0.32852	0.69469	60
Mid-Atlantic	51153	Virginia	Prince William	1.23358	0.55671	0.70106	0.57324	0.78559	0.41717	53
Mid-Atlantic	51159	Virginia	Richmond	0.762434	0.35668	0.24932	0.22003	0.49409	0.66925	61
Mid-Atlantic	51177	Virginia	Spotsylvania	1.28282	0.60139	0.25504	0.3911	0.53062	0.36488	52
Mid-Atlantic	51179	Virginia	Stafford	2.24274	0.66419	0.39045	0.49888	0.61267	0.58305	30
Mid-Atlantic	51181	Virginia	Surry	-0.0693571	0.43192	0.63922	0.20706	0.11769	0.71821	82
Mid-Atlantic	51193	Virginia	Westmoreland	2.11906	0.58065	0.14537	0.10633	0.66066	0.66017	32
Mid-Atlantic	51199	Virginia	York	1.56659	0.31974	0.40671	0.40119	0.80863	0.93564	42
Mid-Atlantic	51510	Virginia	Alexandria city	-0.650553	0.41605	0.46705	0.15961	0.44427	0.03669	88
Mid-Atlantic	51550	Virginia	Chesapeake city	0.120246	0.03613	0.39464	0.48803	0.60619	0.60429	76
Mid-Atlantic	51650	Virginia	Hampton city	0.981439	0.31566	0.26526	0.26071	0.47689	0.80543	58
Mid-Atlantic	51670	Virginia	Hopewell city	-0.0388421	0.02882	0.98895	0.01	0.21052	0.16156	80
Mid-Atlantic	51700	Virginia	Newport News city	0.757452	0.23968	0.24016	0.30883	0.38601	0.79072	63
Mid-Atlantic	51710	Virginia	Norfolk city	-0.0333723	0.26364	0.23212	0.24926	0.30025	0.49191	79
Mid-Atlantic	51735	Virginia	Poquoson city	0.184408	0.46669	0.34225	0.09993	0.44965	0.66207	75
Mid-Atlantic	51740	Virginia	Portsmouth city	-0.0641858	0.24869	0.61792	0.20963	0.45153	0.30378	81
Mid-Atlantic	51760	Virginia	Richmond city	-0.587397	0.34889	0.44479	0.14595	0.44575	0.04511	87
Mid-Atlantic	51800	Virginia	Suffolk city	1.11331	0.29697	0.2675	0.52983	0.38418	0.59503	55
Mid-Atlantic	51810	Virginia	Virginia Beach city	0.105743	0.01	0.10585	0.43674	0.55661	0.6206	77
Mid-Atlantic	51830	Virginia	Williamsburg city	0.0209414	0.38018	0.35908	0.24009	0.51054	0.30061	78
North Pacific	2013	Alaska	Aleutians East	-5.90874	0.41801	0.02349	0.23525	0.19372	0.51107	18
North Pacific	2016	Alaska	Aleutians West	4.12434	0.54735	0.12219	0.43761	0.42179	0.73956	5
North Pacific	2020	Alaska	Anchorage Municipality	2.07369	0.99	0.52399	0.62318	0.69074	0.17655	9
North Pacific	2060	Alaska	Bristol Bay	-7.54246	0.9124	0.08663	0.01	0.23009	0.59373	19
North Pacific	2070	Alaska	Dillingham	21.3333	0.20868	0.01	0.44232	0.28086	0.99	2
North Pacific	2100	Alaska	Haines	10.8728	0.53312	0.06238	0.39702	0.79887	0.56452	3
North Pacific	2105	Alaska	Hoonah-Angoon	0.101018	0.16563	0.22576	0.3123	0.28548	0.58636	16
North Pacific	2110	Alaska	Juneau City and	6.62476	0.57063	0.1563	0.32704	0.99	0.82446	4
North Pacific	2122	Alaska	Kenai Peninsula	3.64018	0.54191	0.24978	0.67525	0.62097	0.58925	6
North Pacific	2130	Alaska	Ketchikan Gateway	3.28304	0.49993	0.14684	0.14935	0.7415	0.86581	7
North Pacific	2150	Alaska	Kodiak Island	44.196	0.4129	0.01	0.42496	0.53944	0.71347	1
North Pacific	2164	Alaska	Lake and Peninsula	1.04814	0.08643	0.04468	0.50939	0.01	0.88494	10
North Pacific	2185	Alaska	North Slope	0.219626	0.19693	0.99	0.99	0.32179	0.01	13
North Pacific	2195	Alaska	Petersburg	0.974109	0.49709	0.30514	0.14127	0.5647	0.8528	11
North Pacific	2198	Alaska	Prince of Wales-Hyder	0.154984	0.12356	0.23354	0.58508	0.13871	0.40105	14
North Pacific	2220	Alaska	Sitka City and	2.12429	0.50934	0.34928	0.09467	0.98755	0.99	8
North Pacific	2261	Alaska	Valdez-Cordova	0.677592	0.23115	0.89485	0.89917	0.73223	0.71419	12
North Pacific	2275	Alaska	Wrangell City and	-0.00760394	0.01	0.222	0.01	0.40903	0.74754	17
North Pacific	2282	Alaska	Yakutat City and	0.129886	0.27405	0.56402	0.12374	0.62296	0.57136	15
Northeast	9001	Connecticut	Fairfield	0.327765	0.2204	0.2843	0.67443	0.25992	0.37094	22
Northeast	9007	Connecticut	Middlesex	0.561059	0.30914	0.24743	0.42539	0.41436	0.56462	16
Northeast	9009	Connecticut	New Haven	0.412091	0.2324	0.31414	0.65727	0.20953	0.54312	20
Northeast	9011	Connecticut	New London	0.11098	0.07722	0.11337	0.65172	0.01	0.51541	24
Northeast	23005	Maine	Cumberland	4.91972	0.59958	0.29814	0.8075	0.99	0.70257	6
Northeast	23009	Maine	Hancock	139.086	0.91578	0.01	0.5675	0.63748	0.82488	1
Northeast	23013	Maine	Knox	24.9614	0.52547	0.02968	0.2864	0.93289	0.81186	4
Northeast	23015	Maine	Lincoln	5.13488	0.99	0.21322	0.19295	0.99	0.67482	5
Northeast	23023	Maine	Sagadahoc	1.93284	0.7645	0.29126	0.17017	0.78524	0.69399	8
Northeast	23027	Maine	Waldo	57.0712	0.89837	0.01	0.30282	0.58565	0.66695	2
Northeast	23029	Maine	Washington	1.18994	0.78564	0.32391	0.23609	0.42881	0.84437	13
Northeast	23031	Maine	York	1.86745	0.46598	0.328	0.59037	0.58441	0.71625	9
Northeast	25001	Massachusetts	Barnstable	1.63733	0.20036	0.19305	0.63172	0.66305	0.74399	10
Northeast	25005	Massachusetts	Bristol	0.331743	0.24594	0.48145	0.57073	0.35006	0.56667	21
Northeast	25007	Massachusetts	Dukes	36.0425	0.25986	0.01185	0.46256	0.88433	0.77411	3
Northeast	25009	Massachusetts	Essex	0.889368	0.36872	0.47716	0.69333	0.52045	0.53388	14
Northeast	25017	Massachusetts	Middlesex	0.538282	0.40025	0.99	0.99	0.716	0.01	17
Northeast	25019	Massachusetts	Nantucket	-0.21958	0.36384	0.18169	0.41067	0.13753	0.52812	28
Northeast	25021	Massachusetts	Norfolk	0.489699	0.23794	0.60762	0.63203	0.755	0.41865	18
Northeast	25023	Massachusetts	Plymouth	1.37626	0.25354	0.26953	0.70168	0.54581	0.70232	11
Northeast	25025	Massachusetts	Suffolk	-0.168414	0.3187	0.51629	0.34117	0.181	0.46736	27
Northeast	33015	New Hampshire	Rockingham	0.699067	0.4434	0.84066	0.73196	0.61565	0.48696	15
Northeast	33017	New Hampshire	Strafford	0.017195	0.3451	0.73559	0.41143	0.32793	0.40685	25
Northeast	44001	Rhode Island	Bristol	0.00345758	0.01	0.51012	0.01	0.63281	0.72025	26
Northeast	44003	Rhode Island	Kent	0.488879	0.30224	0.41849	0.19566	0.723	0.68932	19
Northeast	44005	Rhode Island	Newport	2.53624	0.23296	0.08159	0.22316	0.55046	0.99	7
Northeast	44007	Rhode Island	Providence	0.157422	0.19658	0.45007	0.4069	0.51711	0.41355	23
Northeast	44009	Rhode Island	Washington	1.33994	0.13702	0.18585	0.48361	0.79775	0.96046	12
Pacific	15001	Hawaii	Hawaii	3.99167	0.70421	0.99	0.99	0.55121	0.4792	2
Pacific	15003	Hawaii	Honolulu	28.6949	0.99	0.3857	0.90995	0.99	0.99	1
Pacific	15005	Hawaii	Kalawao	-1.78651	0.01	0.01	0.04928	0.01	0.01	5
Pacific	15007	Hawaii	Kauai	2.01549	0.68882	0.1746	0.01	0.9712	0.07549	4
Pacific	15009	Hawaii	Maui	2.37381	0.91891	0.27	0.49885	0.38445	0.10357	3
Southeast	12009	Florida	Brevard	4.53294	0.53529	0.21152	0.78403	0.61997	0.43653	14
Southeast	12011	Florida	Broward	1.36655	0.44086	0.36421	0.63392	0.65208	0.24855	36
Southeast	12019	Florida	Clay	2.78559	0.47688	0.17525	0.4049	0.74259	0.37907	24
Southeast	12031	Florida	Duval	1.1392	0.44309	0.64753	0.86664	0.60497	0.29088	37
Southeast	12035	Florida	Flagler	3.15809	0.44713	0.12627	0.58176	0.61952	0.21926	23
Southeast	12061	Florida	Indian River	0.18079	0.25009	0.21552	0.51831	0.34729	0.16901	44
Southeast	12085	Florida	Martin	2.09195	0.5483	0.23055	0.46	0.71748	0.26558	33
Southeast	12086	Florida	Miami-Dade	0.258826	0.059	0.37775	0.91667	0.44999	0.36916	43
Southeast	12089	Florida	Nassau	2.57779	0.43686	0.12206	0.46503	0.54424	0.3363	29
Southeast	12095	Florida	Orange	0.297245	0.15408	0.63267	0.94321	0.57058	0.01	42
Southeast	12099	Florida	Palm Beach	3.73631	0.53467	0.26806	0.99	0.66947	0.1944	20
Southeast	12107	Florida	Putnam	-2.08531	0.23521	0.0593	0.43386	0.02445	0.21623	50
Southeast	12109	Florida	St. Johns	2.63264	0.52214	0.28264	0.61621	0.55844	0.50255	26
Southeast	12111	Florida	St. Lucie	-0.234353	0.42364	0.33739	0.38292	0.34369	0.15699	47
Southeast	12117	Florida	Seminole	0.142546	0.08957	0.41943	0.47523	0.86274	0.01	45
Southeast	12127	Florida	Volusia	3.57349	0.32802	0.18334	0.90871	0.58157	0.43039	22
Southeast	13025	Georgia	Brantley	-17.876	0.51167	0.03611	0.1389	0.01	0.2011	52
Southeast	13029	Georgia	Bryan	8.35422	0.49151	0.08728	0.45049	0.72154	0.57643	3
Southeast	13039	Georgia	Camden	10.7325	0.99	0.11871	0.3209	0.64967	0.69269	2
Southeast	13049	Georgia	Charlton	-6.92232	0.66441	0.08083	0.01	0.15274	0.43218	51
Southeast	13051	Georgia	Chatham	2.36616	0.44883	0.4788	0.70952	0.94161	0.60033	32
Southeast	13127	Georgia	Glynn	2.3703	0.34797	0.18995	0.24555	0.84476	0.60709	31
Southeast	13179	Georgia	Liberty	1.75266	0.51004	0.12226	0.37856	0.24816	0.55335	34
Southeast	13191	Georgia	McIntosh	0.0695114	0.01	0.14159	0.26588	0.55425	0.69056	46
Southeast	13305	Georgia	Wayne	-30.9053	0.46655	0.01	0.08317	0.42754	0.18928	53
Southeast	37013	North Carolina	Beaufort	4.69406	0.7094	0.20295	0.36789	0.66754	0.65023	12
Southeast	37015	North Carolina	Bertie	3.61722	0.78567	0.12768	0.31118	0.54121	0.4507	21
Southeast	37019	North Carolina	Brunswick	4.07006	0.55017	0.19741	0.75831	0.4422	0.4608	19
Southeast	37029	North Carolina	Camden	4.93328	0.68401	0.12512	0.32889	0.44837	0.67222	8
Southeast	37031	North Carolina	Carteret	7.50433	0.6481	0.16461	0.42317	0.53397	0.99	5
Southeast	37041	North Carolina	Chowan	4.86609	0.54927	0.08917	0.14912	0.55579	0.72683	9
Southeast	37049	North Carolina	Craven	5.05733	0.59689	0.18274	0.53151	0.4211	0.78679	7
Southeast	37053	North Carolina	Currituck	7.54236	0.61995	0.1271	0.44985	0.48427	0.82323	4
Southeast	37055	North Carolina	Dare	5.52699	0.40243	0.19368	0.52772	0.99	0.83543	6
Southeast	37073	North Carolina	Gates	4.71807	0.67471	0.08929	0.25559	0.61735	0.46462	11
Southeast	37091	North Carolina	Hertford	-1.54553	0.79504	0.12408	0.16724	0.37108	0.35463	49
Southeast	37095	North Carolina	Hyde	1.09665	0.32971	0.53749	0.17593	0.95185	0.8391	38
Southeast	37129	North Carolina	New Hanover	0.818829	0.38619	0.51703	0.23973	0.77057	0.58158	40
Southeast	37133	North Carolina	Onslow	2.61429	0.65757	0.17314	0.47905	0.16823	0.64401	27
Southeast	37137	North Carolina	Pamlico	4.32244	0.90673	0.26742	0.24454	0.56759	0.84926	15
Southeast	37139	North Carolina	Pasquotank	1.62571	0.68787	0.12811	0.15724	0.4416	0.57582	35
Southeast	37141	North Carolina	Pender	17.2047	0.58131	0.04547	0.56117	0.60514	0.48427	1
Southeast	37143	North Carolina	Perquimans	2.73536	0.62182	0.07082	0.1643	0.23745	0.75665	25
Southeast	37177	North Carolina	Tyrrell	0.506691	0.93342	0.99	0.10306	0.28275	0.90012	41
Southeast	37187	North Carolina	Washington	-0.480778	0.48038	0.24567	0.01247	0.18137	0.70309	48
Southeast	45013	South Carolina	Beaufort	2.50727	0.43969	0.20343	0.27813	0.77316	0.5668	30
Southeast	45015	South Carolina	Berkeley	4.54028	0.57441	0.24328	0.70304	0.42143	0.77605	13
Southeast	45019	South Carolina	Charleston	4.25101	0.60752	0.31836	0.6327	0.72224	0.73868	17
Southeast	45029	South Carolina	Colleton	4.278	0.59132	0.1218	0.3528	0.53831	0.55252	16
Southeast	45035	South Carolina	Dorchester	2.6081	0.59873	0.23726	0.50286	0.58613	0.41203	28
Southeast	45043	South Carolina	Georgetown	4.17517	0.32444	0.08724	0.47372	0.42267	0.63838	18
Southeast	45051	South Carolina	Horry	0.833687	0.2226	0.28399	0.57184	0.42643	0.49165	39
Southeast	45053	South Carolina	Jasper	4.74659	0.31127	0.05843	0.20403	0.83922	0.45767	10
West	6001	California	Alameda	0.481418	0.33994	0.34529	0.4586	0.76154	0.22231	38
West	6013	California	Contra Costa	0.786286	0.37935	0.46355	0.60267	0.68788	0.36108	35
West	6015	California	Del Norte	-0.0430954	0.70534	0.32237	0.08096	0.25672	0.77038	44
West	6023	California	Humboldt	6.75287	0.5444	0.12231	0.52138	0.75009	0.7065	8
West	6037	California	Los Angeles	1.71004	0.43516	0.4015	0.91122	0.73701	0.29307	24
West	6041	California	Marin	12.7313	0.38706	0.04447	0.3089	0.75257	0.92393	5
West	6045	California	Mendocino	3.17761	0.67616	0.15874	0.45687	0.72615	0.38807	17
West	6053	California	Monterey	0.0519426	0.01	0.15415	0.56853	0.58928	0.38938	42
West	6055	California	Napa	0.446642	0.39004	0.63342	0.37295	0.64768	0.53396	39
West	6059	California	Orange	0.294619	0.462	0.83815	0.61174	0.83844	0.01	40
West	6067	California	Sacramento	0.489587	0.58454	0.99	0.53584	0.81213	0.27578	37
West	6073	California	San Diego	2.76328	0.54171	0.43057	0.99	0.71248	0.54967	19
West	6075	California	San Francisco	0.62107	0.54823	0.21772	0.1775	0.71636	0.4553	36
West	6077	California	San Joaquin	0.00378552	0.67235	0.42617	0.57683	0.48739	0.02977	43
West	6079	California	San Luis Obispo	1.55162	0.47125	0.52608	0.68441	0.99	0.45099	28
West	6081	California	San Mateo	4.10549	0.39807	0.07675	0.35019	0.70996	0.54921	13
West	6083	California	Santa Barbara	3.76101	0.56187	0.30007	0.63955	0.81634	0.78119	15
West	6085	California	Santa Clara	1.6387	0.36815	0.2341	0.54923	0.75412	0.41725	27
West	6087	California	Santa Cruz	17.3082	0.49002	0.0419	0.32367	0.65371	0.99	2
West	6095	California	Solano	1.18377	0.46417	0.341	0.55219	0.73895	0.33312	30
West	6097	California	Sonoma	4.33271	0.48702	0.17533	0.55645	0.81435	0.64012	11
West	6111	California	Ventura	4.26577	0.58627	0.28677	0.61275	0.76826	0.89017	12
West	6113	California	Yolo	0.87137	0.58763	0.20474	0.39354	0.5957	0.32365	34
West	41007	Oregon	Clatsop	1.7953	0.75987	0.08685	0.20893	0.6518	0.44481	22
West	41009	Oregon	Columbia	-1.25415	0.99	0.26821	0.21741	0.41059	0.32469	45
West	41011	Oregon	Coos	2.34265	0.49742	0.06716	0.24195	0.52491	0.56064	21
West	41015	Oregon	Curry	1.06895	0.76343	0.26171	0.03928	0.73484	0.66696	32
West	41019	Oregon	Douglas	4.6693	0.66819	0.1583	0.46974	0.61946	0.64531	10
West	41039	Oregon	Lane	9.38847	0.8548	0.14269	0.62497	0.70836	0.64348	6
West	41041	Oregon	Lincoln	1.65879	0.77953	0.14158	0.20942	0.54077	0.57875	26
West	41051	Oregon	Multnomah	0.190852	0.55227	0.31342	0.26524	0.62785	0.34522	41
West	41057	Oregon	Tillamook	0.930009	0.85522	0.336	0.23182	0.57974	0.5576	33
West	53009	Washington	Clallam	71.1263	0.62858	0.01	0.37616	0.81876	0.61887	1
West	53027	Washington	Grays Harbor	3.56358	0.86459	0.104	0.32647	0.40104	0.6147	16
West	53029	Washington	Island	1.78673	0.56096	0.19437	0.37551	0.64831	0.47375	23
West	53031	Washington	Jefferson	1.48321	0.18998	0.135	0.29974	0.78249	0.69396	29
West	53033	Washington	King	4.07256	0.77405	0.33972	0.80641	0.71556	0.54357	14
West	53035	Washington	Kitsap	1.12534	0.49819	0.23708	0.53575	0.55508	0.31173	31
West	53045	Washington	Mason	2.81591	0.57782	0.08029	0.38928	0.45196	0.48317	18
West	53049	Washington	Pacific	-2.69558	0.72395	0.12213	0.11565	0.40237	0.38838	46
West	53053	Washington	Pierce	2.44594	0.69085	0.36621	0.67129	0.61684	0.51339	20
West	53055	Washington	San Juan	7.42322	0.37068	0.08556	0.38976	0.77375	0.94737	7
West	53057	Washington	Skagit	14.1527	0.84354	0.10485	0.42607	0.72396	0.96673	3
West	53061	Washington	Snohomish	6.59491	0.65769	0.21166	0.66481	0.74079	0.86901	9
West	53067	Washington	Thurston	1.69477	0.82321	0.405	0.52475	0.74933	0.33826	25
West	53069	Washington	Wahkiakum	-4.72295	0.93578	0.22819	0.01	0.01	0.43377	47
West	53073	Washington	Whatcom	13.3371	0.70193	0.10467	0.53916	0.80244	0.89835	4

## Sheet: Rescale Change in Reg rank  
Region	FIPS	State Name	County Name	Unscaled ENOW CRSI Rank within Region	Regional ENOW Rescale CRSI Rank within Region	Change in Rank Unscaled to Regional
Great Lakes	17031	Illinois	Cook	72	77	-5
Great Lakes	17097	Illinois	Lake	42	62	-20
Great Lakes	18089	Indiana	Lake	83	80	3
Great Lakes	18091	Indiana	LaPorte	52	68	-16
Great Lakes	18127	Indiana	Porter	49	67	-18
Great Lakes	26001	Michigan	Alcona	55	33	22
Great Lakes	26003	Michigan	Alger	63	36	27
Great Lakes	26005	Michigan	Allegan	25	11	14
Great Lakes	26007	Michigan	Alpena	40	24	16
Great Lakes	26009	Michigan	Antrim	54	37	17
Great Lakes	26011	Michigan	Arenac	41	29	12
Great Lakes	26013	Michigan	Baraga	60	64	-4
Great Lakes	26017	Michigan	Bay	38	25	13
Great Lakes	26019	Michigan	Benzie	23	38	-15
Great Lakes	26021	Michigan	Berrien	66	65	1
Great Lakes	26029	Michigan	Charlevoix	51	53	-2
Great Lakes	26031	Michigan	Cheboygan	30	21	9
Great Lakes	26033	Michigan	Chippewa	19	31	-12
Great Lakes	26041	Michigan	Delta	24	15	9
Great Lakes	26047	Michigan	Emmet	16	13	3
Great Lakes	26053	Michigan	Gogebic	56	41	15
Great Lakes	26055	Michigan	Grand Traverse	29	20	9
Great Lakes	26061	Michigan	Houghton	59	71	-12
Great Lakes	26063	Michigan	Huron	8	2	6
Great Lakes	26069	Michigan	Iosco	46	23	23
Great Lakes	26083	Michigan	Keweenaw	84	85	-1
Great Lakes	26089	Michigan	Leelanau	43	56	-13
Great Lakes	26095	Michigan	Luce	75	82	-7
Great Lakes	26097	Michigan	Mackinac	44	35	9
Great Lakes	26099	Michigan	Macomb	74	78	-4
Great Lakes	26101	Michigan	Manistee	57	43	14
Great Lakes	26103	Michigan	Marquette	22	57	-35
Great Lakes	26105	Michigan	Mason	33	28	5
Great Lakes	26109	Michigan	Menominee	58	48	10
Great Lakes	26115	Michigan	Monroe	76	69	7
Great Lakes	26121	Michigan	Muskegon	78	59	19
Great Lakes	26127	Michigan	Oceana	3	1	2
Great Lakes	26131	Michigan	Ontonagon	67	73	-6
Great Lakes	26139	Michigan	Ottawa	12	9	3
Great Lakes	26141	Michigan	Presque Isle	65	45	20
Great Lakes	26145	Michigan	Saginaw	39	42	-3
Great Lakes	26147	Michigan	St. Clair	17	18	-1
Great Lakes	26151	Michigan	Sanilac	5	6	-1
Great Lakes	26153	Michigan	Schoolcraft	50	46	4
Great Lakes	26157	Michigan	Tuscola	14	8	6
Great Lakes	26159	Michigan	Van Buren	81	70	11
Great Lakes	26163	Michigan	Wayne	82	83	-1
Great Lakes	27031	Minnesota	Cook	1	19	-18
Great Lakes	27075	Minnesota	Lake	10	34	-24
Great Lakes	27137	Minnesota	St. Louis	4	27	-23
Great Lakes	36011	New York	Cayuga	31	30	1
Great Lakes	36013	New York	Chautauqua	28	58	-30
Great Lakes	36029	New York	Erie	37	49	-12
Great Lakes	36045	New York	Jefferson	2	5	-3
Great Lakes	36055	New York	Monroe	34	47	-13
Great Lakes	36063	New York	Niagara	62	55	7
Great Lakes	36073	New York	Orleans	71	76	-5
Great Lakes	36075	New York	Oswego	45	52	-7
Great Lakes	36089	New York	St. Lawrence	7	22	-15
Great Lakes	36117	New York	Wayne	48	44	4
Great Lakes	39007	Ohio	Ashtabula	77	75	2
Great Lakes	39035	Ohio	Cuyahoga	69	79	-10
Great Lakes	39043	Ohio	Erie	68	54	14
Great Lakes	39085	Ohio	Lake	80	72	8
Great Lakes	39093	Ohio	Lorain	70	74	-4
Great Lakes	39095	Ohio	Lucas	85	84	1
Great Lakes	39123	Ohio	Ottawa	79	63	16
Great Lakes	39143	Ohio	Sandusky	61	60	1
Great Lakes	39173	Ohio	Wood	32	51	-19
Great Lakes	42049	Pennsylvania	Erie	47	81	-34
Great Lakes	55003	Wisconsin	Ashland	11	3	8
Great Lakes	55007	Wisconsin	Bayfield	27	14	13
Great Lakes	55009	Wisconsin	Brown	35	40	-5
Great Lakes	55029	Wisconsin	Door	13	10	3
Great Lakes	55031	Wisconsin	Douglas	18	26	-8
Great Lakes	55051	Wisconsin	Iron	21	16	5
Great Lakes	55059	Wisconsin	Kenosha	73	61	12
Great Lakes	55061	Wisconsin	Kewaunee	26	12	14
Great Lakes	55071	Wisconsin	Manitowoc	15	39	-24
Great Lakes	55075	Wisconsin	Marinette	20	17	3
Great Lakes	55079	Wisconsin	Milwaukee	64	66	-2
Great Lakes	55083	Wisconsin	Oconto	6	7	-1
Great Lakes	55089	Wisconsin	Ozaukee	36	32	4
Great Lakes	55101	Wisconsin	Racine	53	50	3
Great Lakes	55117	Wisconsin	Sheboygan	9	4	5
Gulf of Mexico	1003	Alabama	Baldwin	22	11	11
Gulf of Mexico	1097	Alabama	Mobile	61	39	22
Gulf of Mexico	12005	Florida	Bay	6	7	-1
Gulf of Mexico	12015	Florida	Charlotte	17	37	-20
Gulf of Mexico	12017	Florida	Citrus	36	15	21
Gulf of Mexico	12021	Florida	Collier	8	31	-23
Gulf of Mexico	12029	Florida	Dixie	67	45	22
Gulf of Mexico	12033	Florida	Escambia	47	44	3
Gulf of Mexico	12037	Florida	Franklin	5	3	2
Gulf of Mexico	12045	Florida	Gulf	65	4	61
Gulf of Mexico	12053	Florida	Hernando	66	32	34
Gulf of Mexico	12057	Florida	Hillsborough	12	38	-26
Gulf of Mexico	12065	Florida	Jefferson	11	2	9
Gulf of Mexico	12069	Florida	Lake	42	26	16
Gulf of Mexico	12071	Florida	Lee	26	49	-23
Gulf of Mexico	12073	Florida	Leon	35	18	17
Gulf of Mexico	12075	Florida	Levy	18	12	6
Gulf of Mexico	12077	Florida	Liberty	68	66	2
Gulf of Mexico	12081	Florida	Manatee	55	52	3
Gulf of Mexico	12087	Florida	Monroe	62	65	-3
Gulf of Mexico	12091	Florida	Okaloosa	39	30	9
Gulf of Mexico	12101	Florida	Pasco	48	48	0
Gulf of Mexico	12103	Florida	Pinellas	13	40	-27
Gulf of Mexico	12105	Florida	Polk	21	34	-13
Gulf of Mexico	12113	Florida	Santa Rosa	44	35	9
Gulf of Mexico	12115	Florida	Sarasota	41	46	-5
Gulf of Mexico	12123	Florida	Taylor	27	19	8
Gulf of Mexico	12129	Florida	Wakulla	38	21	17
Gulf of Mexico	12131	Florida	Walton	57	17	40
Gulf of Mexico	22019	Louisiana	Calcasieu	10	16	-6
Gulf of Mexico	22023	Louisiana	Cameron	52	60	-8
Gulf of Mexico	22045	Louisiana	Iberia	60	63	-3
Gulf of Mexico	22051	Louisiana	Jefferson	31	47	-16
Gulf of Mexico	22057	Louisiana	Lafourche	53	53	0
Gulf of Mexico	22063	Louisiana	Livingston	25	33	-8
Gulf of Mexico	22071	Louisiana	Orleans	64	64	0
Gulf of Mexico	22075	Louisiana	Plaquemines	51	62	-11
Gulf of Mexico	22087	Louisiana	St. Bernard	46	56	-10
Gulf of Mexico	22089	Louisiana	St. Charles	32	42	-10
Gulf of Mexico	22093	Louisiana	St. James	40	58	-18
Gulf of Mexico	22095	Louisiana	St. John the Baptist	43	51	-8
Gulf of Mexico	22099	Louisiana	St. Martin	45	57	-12
Gulf of Mexico	22101	Louisiana	St. Mary	30	43	-13
Gulf of Mexico	22103	Louisiana	St. Tammany	37	23	14
Gulf of Mexico	22105	Louisiana	Tangipahoa	16	28	-12
Gulf of Mexico	22109	Louisiana	Terrebonne	54	54	0
Gulf of Mexico	22113	Louisiana	Vermilion	24	41	-17
Gulf of Mexico	28045	Mississippi	Hancock	58	55	3
Gulf of Mexico	28047	Mississippi	Harrison	50	29	21
Gulf of Mexico	28059	Mississippi	Jackson	28	14	14
Gulf of Mexico	48007	Texas	Aransas	33	20	13
Gulf of Mexico	48039	Texas	Brazoria	1	5	-4
Gulf of Mexico	48057	Texas	Calhoun	29	24	5
Gulf of Mexico	48061	Texas	Cameron	3	6	-3
Gulf of Mexico	48071	Texas	Chambers	20	50	-30
Gulf of Mexico	48167	Texas	Galveston	23	36	-13
Gulf of Mexico	48201	Texas	Harris	63	59	4
Gulf of Mexico	48239	Texas	Jackson	19	9	10
Gulf of Mexico	48245	Texas	Jefferson	14	25	-11
Gulf of Mexico	48261	Texas	Kenedy	59	68	-9
Gulf of Mexico	48273	Texas	Kleberg	34	67	-33
Gulf of Mexico	48321	Texas	Matagorda	15	10	5
Gulf of Mexico	48355	Texas	Nueces	4	13	-9
Gulf of Mexico	48361	Texas	Orange	56	61	-5
Gulf of Mexico	48391	Texas	Refugio	49	22	27
Gulf of Mexico	48409	Texas	San Patricio	9	8	1
Gulf of Mexico	48469	Texas	Victoria	2	1	1
Gulf of Mexico	48489	Texas	Willacy	7	27	-20
Mid-Atlantic	10001	Delaware	Kent	8	15	-7
Mid-Atlantic	10003	Delaware	New Castle	56	43	13
Mid-Atlantic	10005	Delaware	Sussex	15	29	-14
Mid-Atlantic	24003	Maryland	Anne Arundel	53	33	20
Mid-Atlantic	24005	Maryland	Baltimore	47	36	11
Mid-Atlantic	24009	Maryland	Calvert	46	25	21
Mid-Atlantic	24011	Maryland	Caroline	19	48	-29
Mid-Atlantic	24015	Maryland	Cecil	58	66	-8
Mid-Atlantic	24017	Maryland	Charles	12	21	-9
Mid-Atlantic	24019	Maryland	Dorchester	45	73	-28
Mid-Atlantic	24025	Maryland	Harford	36	27	9
Mid-Atlantic	24029	Maryland	Kent	35	24	11
Mid-Atlantic	24033	Maryland	Prince George's	60	44	16
Mid-Atlantic	24035	Maryland	Queen Anne's	5	4	1
Mid-Atlantic	24037	Maryland	St. Mary's	14	18	-4
Mid-Atlantic	24039	Maryland	Somerset	22	92	-70
Mid-Atlantic	24041	Maryland	Talbot	24	8	16
Mid-Atlantic	24045	Maryland	Wicomico	23	28	-5
Mid-Atlantic	24047	Maryland	Worcester	9	22	-13
Mid-Atlantic	24510	Maryland	Baltimore city	88	89	-1
Mid-Atlantic	34001	New Jersey	Atlantic	37	59	-22
Mid-Atlantic	34003	New Jersey	Bergen	77	56	21
Mid-Atlantic	34005	New Jersey	Burlington	13	16	-3
Mid-Atlantic	34007	New Jersey	Camden	74	64	10
Mid-Atlantic	34009	New Jersey	Cape May	39	69	-30
Mid-Atlantic	34011	New Jersey	Cumberland	50	51	-1
Mid-Atlantic	34013	New Jersey	Essex	83	74	9
Mid-Atlantic	34015	New Jersey	Gloucester	76	68	8
Mid-Atlantic	34017	New Jersey	Hudson	84	84	0
Mid-Atlantic	34023	New Jersey	Middlesex	71	47	24
Mid-Atlantic	34025	New Jersey	Monmouth	26	57	-31
Mid-Atlantic	34029	New Jersey	Ocean	27	62	-35
Mid-Atlantic	34033	New Jersey	Salem	33	91	-58
Mid-Atlantic	34035	New Jersey	Somerset	54	31	23
Mid-Atlantic	34039	New Jersey	Union	81	37	44
Mid-Atlantic	36001	New York	Albany	16	5	11
Mid-Atlantic	36005	New York	Bronx	89	90	-1
Mid-Atlantic	36027	New York	Dutchess	31	13	18
Mid-Atlantic	36047	New York	Kings	82	85	-3
Mid-Atlantic	36059	New York	Nassau	34	14	20
Mid-Atlantic	36061	New York	New York	86	83	3
Mid-Atlantic	36071	New York	Orange	18	6	12
Mid-Atlantic	36079	New York	Putnam	30	3	27
Mid-Atlantic	36081	New York	Queens	65	35	30
Mid-Atlantic	36085	New York	Richmond	63	41	22
Mid-Atlantic	36087	New York	Rockland	75	54	21
Mid-Atlantic	36103	New York	Suffolk	2	7	-5
Mid-Atlantic	36111	New York	Ulster	3	1	2
Mid-Atlantic	36119	New York	Westchester	59	23	36
Mid-Atlantic	42017	Pennsylvania	Bucks	10	11	-1
Mid-Atlantic	42045	Pennsylvania	Delaware	78	72	6
Mid-Atlantic	42101	Pennsylvania	Philadelphia	85	86	-1
Mid-Atlantic	51001	Virginia	Accomack	6	19	-13
Mid-Atlantic	51013	Virginia	Arlington	92	93	-1
Mid-Atlantic	51033	Virginia	Caroline	20	10	10
Mid-Atlantic	51036	Virginia	Charles City	42	9	33
Mid-Atlantic	51041	Virginia	Chesterfield	67	65	2
Mid-Atlantic	51057	Virginia	Essex	38	39	-1
Mid-Atlantic	51059	Virginia	Fairfax	70	40	30
Mid-Atlantic	51073	Virginia	Gloucester	43	34	9
Mid-Atlantic	51085	Virginia	Hanover	40	17	23
Mid-Atlantic	51087	Virginia	Henrico	79	70	9
Mid-Atlantic	51093	Virginia	Isle of Wight	32	67	-35
Mid-Atlantic	51095	Virginia	James City	57	50	7
Mid-Atlantic	51097	Virginia	King and Queen	25	45	-20
Mid-Atlantic	51099	Virginia	King George	17	20	-3
Mid-Atlantic	51101	Virginia	King William	1	2	-1
Mid-Atlantic	51103	Virginia	Lancaster	29	38	-9
Mid-Atlantic	51115	Virginia	Mathews	7	46	-39
Mid-Atlantic	51119	Virginia	Middlesex	11	49	-38
Mid-Atlantic	51127	Virginia	New Kent	28	12	16
Mid-Atlantic	51131	Virginia	Northampton	21	71	-50
Mid-Atlantic	51133	Virginia	Northumberland	4	26	-22
Mid-Atlantic	51149	Virginia	Prince George	52	60	-8
Mid-Atlantic	51153	Virginia	Prince William	72	53	19
Mid-Atlantic	51159	Virginia	Richmond	51	61	-10
Mid-Atlantic	51177	Virginia	Spotsylvania	64	52	12
Mid-Atlantic	51179	Virginia	Stafford	61	30	31
Mid-Atlantic	51181	Virginia	Surry	62	82	-20
Mid-Atlantic	51193	Virginia	Westmoreland	41	32	9
Mid-Atlantic	51199	Virginia	York	49	42	7
Mid-Atlantic	51510	Virginia	Alexandria city	90	88	2
Mid-Atlantic	51550	Virginia	Chesapeake city	68	76	-8
Mid-Atlantic	51650	Virginia	Hampton city	66	58	8
Mid-Atlantic	51670	Virginia	Hopewell city	91	80	11
Mid-Atlantic	51700	Virginia	Newport News city	69	63	6
Mid-Atlantic	51710	Virginia	Norfolk city	80	79	1
Mid-Atlantic	51735	Virginia	Poquoson city	55	75	-20
Mid-Atlantic	51740	Virginia	Portsmouth city	87	81	6
Mid-Atlantic	51760	Virginia	Richmond city	93	87	6
Mid-Atlantic	51800	Virginia	Suffolk city	44	55	-11
Mid-Atlantic	51810	Virginia	Virginia Beach city	48	77	-29
Mid-Atlantic	51830	Virginia	Williamsburg city	73	78	-5
North Pacific	2013	Alaska	Aleutians East	2	18	-16
North Pacific	2016	Alaska	Aleutians West	4	5	-1
North Pacific	2020	Alaska	Anchorage Municipality	8	9	-1
North Pacific	2060	Alaska	Bristol Bay	7	19	-12
North Pacific	2070	Alaska	Dillingham	5	2	3
North Pacific	2100	Alaska	Haines	3	3	0
North Pacific	2105	Alaska	Hoonah-Angoon	13	16	-3
North Pacific	2110	Alaska	Juneau City and	9	4	5
North Pacific	2122	Alaska	Kenai Peninsula	11	6	5
North Pacific	2130	Alaska	Ketchikan Gateway	12	7	5
North Pacific	2150	Alaska	Kodiak Island	1	1	0
North Pacific	2164	Alaska	Lake and Peninsula	6	10	-4
North Pacific	2185	Alaska	North Slope	10	13	-3
North Pacific	2195	Alaska	Petersburg	15	11	4
North Pacific	2198	Alaska	Prince of Wales-Hyder	17	14	3
North Pacific	2220	Alaska	Sitka City and	14	8	6
North Pacific	2261	Alaska	Valdez-Cordova	16	12	4
North Pacific	2275	Alaska	Wrangell City and	19	17	2
North Pacific	2282	Alaska	Yakutat City and	18	15	3
Northeast	9001	Connecticut	Fairfield	16	22	-6
Northeast	9007	Connecticut	Middlesex	23	16	7
Northeast	9009	Connecticut	New Haven	17	20	-3
Northeast	9011	Connecticut	New London	12	24	-12
Northeast	23005	Maine	Cumberland	6	6	0
Northeast	23009	Maine	Hancock	1	1	0
Northeast	23013	Maine	Knox	4	4	0
Northeast	23015	Maine	Lincoln	9	5	4
Northeast	23023	Maine	Sagadahoc	13	8	5
Northeast	23027	Maine	Waldo	3	2	1
Northeast	23029	Maine	Washington	5	13	-8
Northeast	23031	Maine	York	11	9	2
Northeast	25001	Massachusetts	Barnstable	7	10	-3
Northeast	25005	Massachusetts	Bristol	19	21	-2
Northeast	25007	Massachusetts	Dukes	2	3	-1
Northeast	25009	Massachusetts	Essex	14	14	0
Northeast	25017	Massachusetts	Middlesex	22	17	5
Northeast	25019	Massachusetts	Nantucket	21	28	-7
Northeast	25021	Massachusetts	Norfolk	20	18	2
Northeast	25023	Massachusetts	Plymouth	8	11	-3
Northeast	25025	Massachusetts	Suffolk	26	27	-1
Northeast	33015	New Hampshire	Rockingham	18	15	3
Northeast	33017	New Hampshire	Strafford	25	25	0
Northeast	44001	Rhode Island	Bristol	28	26	2
Northeast	44003	Rhode Island	Kent	27	19	8
Northeast	44005	Rhode Island	Newport	15	7	8
Northeast	44007	Rhode Island	Providence	24	23	1
Northeast	44009	Rhode Island	Washington	10	12	-2
Pacific	15001	Hawaii	Hawaii	2	2	0
Pacific	15003	Hawaii	Honolulu	1	1	0
Pacific	15005	Hawaii	Kalawao	5	5	0
Pacific	15007	Hawaii	Kauai	4	4	0
Pacific	15009	Hawaii	Maui	3	3	0
Southeast	12009	Florida	Brevard	6	14	-8
Southeast	12011	Florida	Broward	15	36	-21
Southeast	12019	Florida	Clay	17	24	-7
Southeast	12031	Florida	Duval	24	37	-13
Southeast	12035	Florida	Flagler	37	23	14
Southeast	12061	Florida	Indian River	48	44	4
Southeast	12085	Florida	Martin	21	33	-12
Southeast	12086	Florida	Miami-Dade	20	43	-23
Southeast	12089	Florida	Nassau	35	29	6
Southeast	12095	Florida	Orange	46	42	4
Southeast	12099	Florida	Palm Beach	4	20	-16
Southeast	12107	Florida	Putnam	47	50	-3
Southeast	12109	Florida	St. Johns	26	26	0
Southeast	12111	Florida	St. Lucie	50	47	3
Southeast	12117	Florida	Seminole	51	45	6
Southeast	12127	Florida	Volusia	5	22	-17
Southeast	13025	Georgia	Brantley	52	52	0
Southeast	13029	Georgia	Bryan	8	3	5
Southeast	13039	Georgia	Camden	2	2	0
Southeast	13049	Georgia	Charlton	44	51	-7
Southeast	13051	Georgia	Chatham	18	32	-14
Southeast	13127	Georgia	Glynn	32	31	1
Southeast	13179	Georgia	Liberty	31	34	-3
Southeast	13191	Georgia	McIntosh	53	46	7
Southeast	13305	Georgia	Wayne	41	53	-12
Southeast	37013	North Carolina	Beaufort	19	12	7
Southeast	37015	North Carolina	Bertie	10	21	-11
Southeast	37019	North Carolina	Brunswick	9	19	-10
Southeast	37029	North Carolina	Camden	34	8	26
Southeast	37031	North Carolina	Carteret	12	5	7
Southeast	37041	North Carolina	Chowan	25	9	16
Southeast	37049	North Carolina	Craven	11	7	4
Southeast	37053	North Carolina	Currituck	16	4	12
Southeast	37055	North Carolina	Dare	3	6	-3
Southeast	37073	North Carolina	Gates	28	11	17
Southeast	37091	North Carolina	Hertford	43	49	-6
Southeast	37095	North Carolina	Hyde	40	38	2
Southeast	37129	North Carolina	New Hanover	38	40	-2
Southeast	37133	North Carolina	Onslow	14	27	-13
Southeast	37137	North Carolina	Pamlico	23	15	8
Southeast	37139	North Carolina	Pasquotank	33	35	-2
Southeast	37141	North Carolina	Pender	1	1	0
Southeast	37143	North Carolina	Perquimans	30	25	5
Southeast	37177	North Carolina	Tyrrell	39	41	-2
Southeast	37187	North Carolina	Washington	49	48	1
Southeast	45013	South Carolina	Beaufort	45	30	15
Southeast	45015	South Carolina	Berkeley	7	13	-6
Southeast	45019	South Carolina	Charleston	13	17	-4
Southeast	45029	South Carolina	Colleton	36	16	20
Southeast	45035	South Carolina	Dorchester	29	28	1
Southeast	45043	South Carolina	Georgetown	22	18	4
Southeast	45051	South Carolina	Horry	27	39	-12
Southeast	45053	South Carolina	Jasper	42	10	32
West	6001	California	Alameda	38	38	0
West	6013	California	Contra Costa	44	35	9
West	6015	California	Del Norte	25	44	-19
West	6023	California	Humboldt	2	8	-6
West	6037	California	Los Angeles	23	24	-1
West	6041	California	Marin	9	5	4
West	6045	California	Mendocino	14	17	-3
West	6053	California	Monterey	46	42	4
West	6055	California	Napa	45	39	6
West	6059	California	Orange	41	40	1
West	6067	California	Sacramento	33	37	-4
West	6073	California	San Diego	11	19	-8
West	6075	California	San Francisco	13	36	-23
West	6077	California	San Joaquin	29	43	-14
West	6079	California	San Luis Obispo	17	28	-11
West	6081	California	San Mateo	26	13	13
West	6083	California	Santa Barbara	8	15	-7
West	6085	California	Santa Clara	37	27	10
West	6087	California	Santa Cruz	18	2	16
West	6095	California	Solano	43	30	13
West	6097	California	Sonoma	22	11	11
West	6111	California	Ventura	7	12	-5
West	6113	California	Yolo	27	34	-7
West	41007	Oregon	Clatsop	31	22	9
West	41009	Oregon	Columbia	40	45	-5
West	41011	Oregon	Coos	34	21	13
West	41015	Oregon	Curry	42	32	10
West	41019	Oregon	Douglas	20	10	10
West	41039	Oregon	Lane	10	6	4
West	41041	Oregon	Lincoln	36	26	10
West	41051	Oregon	Multnomah	30	41	-11
West	41057	Oregon	Tillamook	24	33	-9
West	53009	Washington	Clallam	12	1	11
West	53027	Washington	Grays Harbor	15	16	-1
West	53029	Washington	Island	35	23	12
West	53031	Washington	Jefferson	32	29	3
West	53033	Washington	King	5	14	-9
West	53035	Washington	Kitsap	39	31	8
West	53045	Washington	Mason	19	18	1
West	53049	Washington	Pacific	28	46	-18
West	53053	Washington	Pierce	16	20	-4
West	53055	Washington	San Juan	1	7	-6
West	53057	Washington	Skagit	6	3	3
West	53061	Washington	Snohomish	3	9	-6
West	53067	Washington	Thurston	21	25	-4
West	53069	Washington	Wahkiakum	47	47	0
West	53073	Washington	Whatcom	4	4	0
